# Supplementary material for: Bi- and tri-metallic Rh and Ir complexes containing click derived bis- and tris-(pyrazolyl-1,2,3-triazolyl) N–N′ donor ligands and their application as catalysts for the dihydroalkoxylation of alkynes
Source: Royal Society of Chemistry journal article supplement (doi:10.1039/c3dt53295j), 2014-01-01
Supplement: c3dt53295j1.pdf [file c3dt53295j1.pdf]

Supporting Information

**Bi- and tri-metallic Rh and Ir complexes containing click derived (pyrazolyl-  
1,2,3-triazolyl) N-N' donor ligands and their application as alkyne  
dihydroalkoxylation catalysts**

Khuong Q. Vuong,<sup>a,b</sup> Chin M. Wong,<sup>a</sup> Mohan Bhadbhade<sup>a,c</sup> and Barbara A. Messerle\*,<sup>a</sup>

<sup>a</sup> School of Chemistry and <sup>c</sup> X-ray Diffraction Laboratory, Mark Wainwright Analytical Centre, The  
University of New South Wales, Kensington, NSW 2052, Australia.

<sup>b</sup> Institute of Chemical and Engineering Sciences, 1 Pesek Road, Jurong Island, Singapore 627833

Telephone: +61-2-9385 4653

Fascimile: +61-2- 9385 6141

Email: [b.messerle@unsw.edu.au](mailto:b.messerle@unsw.edu.au)

## Table of Contents for Supporting Information

|                                                                                                                                                                                                                                                                                                                                                                                                                                                                     |       |
|---------------------------------------------------------------------------------------------------------------------------------------------------------------------------------------------------------------------------------------------------------------------------------------------------------------------------------------------------------------------------------------------------------------------------------------------------------------------|-------|
| S1. Synthesis of ligands                                                                                                                                                                                                                                                                                                                                                                                                                                            | SI-4  |
| S1.1 Synthesis of <i>m</i> -C <sub>6</sub> H <sub>4</sub> (PyT) <sub>2</sub> ( <b>1b</b> )                                                                                                                                                                                                                                                                                                                                                                          | SI-4  |
| S1.2 Synthesis of <i>p</i> -C <sub>6</sub> H <sub>4</sub> (PyT) <sub>2</sub> ( <b>1c</b> )                                                                                                                                                                                                                                                                                                                                                                          | SI-5  |
| S1.3 Synthesis of <i>1,3,5</i> -C <sub>6</sub> H <sub>4</sub> (PyT) <sub>3</sub> ( <b>1d</b> )                                                                                                                                                                                                                                                                                                                                                                      | SI-6  |
| S2. Synthesis of Rh(CO) <sub>2</sub> Complexes                                                                                                                                                                                                                                                                                                                                                                                                                      | SI-7  |
| S2.1 Synthesis of <i>m</i> -C <sub>6</sub> H <sub>4</sub> [(PyT)Rh(CO) <sub>2</sub> ] <sub>2</sub> [BAr <sup>F</sup> <sub>4</sub> ] <sub>2</sub> ( <b>2b</b> )                                                                                                                                                                                                                                                                                                      | SI-7  |
| S2.2 Synthesis of <i>p</i> -C <sub>6</sub> H <sub>4</sub> [(PyT)Rh(CO) <sub>2</sub> ] <sub>2</sub> [BAr <sup>F</sup> <sub>4</sub> ] <sub>2</sub> ( <b>2c</b> )                                                                                                                                                                                                                                                                                                      | SI-8  |
| S2.3 Synthesis of <i>1,3,5</i> -C <sub>6</sub> H <sub>3</sub> [(PyT)Rh(CO) <sub>2</sub> ] <sub>3</sub> [BAr <sup>F</sup> <sub>4</sub> ] <sub>3</sub> ( <b>2d</b> )                                                                                                                                                                                                                                                                                                  | SI-9  |
| S3. Synthesis of Ir(CO) <sub>2</sub> Complexes                                                                                                                                                                                                                                                                                                                                                                                                                      | SI-10 |
| S3.1 Synthesis of <i>m</i> -C <sub>6</sub> H <sub>4</sub> [(PyT)Ir(CO) <sub>2</sub> ] <sub>2</sub> [BAr <sup>F</sup> <sub>4</sub> ] <sub>2</sub> ( <b>3b</b> )                                                                                                                                                                                                                                                                                                      | SI-10 |
| S3.2 Synthesis of <i>p</i> -C <sub>6</sub> H <sub>4</sub> [(PyT)Ir(CO) <sub>2</sub> ] <sub>2</sub> [BAr <sup>F</sup> <sub>4</sub> ] <sub>2</sub> ( <b>3c</b> )                                                                                                                                                                                                                                                                                                      | SI-11 |
| S3.3 Synthesis of <i>1,3,5</i> -C <sub>6</sub> H <sub>3</sub> [(PyT)Ir(CO) <sub>2</sub> ] <sub>3</sub> [BAr <sup>F</sup> <sub>4</sub> ] <sub>3</sub> ( <b>3d</b> )                                                                                                                                                                                                                                                                                                  | SI-12 |
| S4. Synthesis of RhCp* Complexes                                                                                                                                                                                                                                                                                                                                                                                                                                    | SI-14 |
| S4.1 Synthesis of <i>m</i> -C <sub>6</sub> H <sub>4</sub> [(PyT)RhCp*Cl] <sub>2</sub> [BAr <sup>F</sup> <sub>4</sub> ] <sub>2</sub> ( <b>4b</b> )                                                                                                                                                                                                                                                                                                                   | SI-14 |
| S4.2 Synthesis of <i>p</i> -C <sub>6</sub> H <sub>4</sub> [(PyT)RhCp*Cl] <sub>2</sub> [BAr <sup>F</sup> <sub>4</sub> ] <sub>2</sub> ( <b>4c</b> )                                                                                                                                                                                                                                                                                                                   | SI-15 |
| S4.3 Synthesis of <i>1,3,5</i> -C <sub>6</sub> H <sub>3</sub> [(PyT)RhCp*Cl] <sub>3</sub> [BAr <sup>F</sup> <sub>4</sub> ] <sub>3</sub> ( <b>4d</b> )                                                                                                                                                                                                                                                                                                               | SI-16 |
| S5. Synthesis of IrCp* complexes                                                                                                                                                                                                                                                                                                                                                                                                                                    | SI-17 |
| S5.1 Synthesis of <i>m</i> -C <sub>6</sub> H <sub>4</sub> [(PyT)IrCp*Cl] <sub>2</sub> [BAr <sup>F</sup> <sub>4</sub> ] <sub>2</sub> ( <b>5b</b> )                                                                                                                                                                                                                                                                                                                   | SI-17 |
| S5.2 Synthesis of <i>p</i> -C <sub>6</sub> H <sub>4</sub> [(PyT)IrCp*Cl] <sub>2</sub> [BAr <sup>F</sup> <sub>4</sub> ] <sub>2</sub> ( <b>5c</b> )                                                                                                                                                                                                                                                                                                                   | SI-19 |
| S5.3 Synthesis of <i>1,3,5</i> -C <sub>6</sub> H <sub>3</sub> [(PyT)IrCp*Cl] <sub>3</sub> [BAr <sup>F</sup> <sub>4</sub> ] <sub>3</sub> ( <b>5d</b> )                                                                                                                                                                                                                                                                                                               | SI-20 |
| Table S1: νCO (cm <sup>-1</sup> ) <sup>a</sup> and δ (ppm) of the carbonyls co-ligands in complexes <b>2a-d</b> and <b>3a-d</b> .                                                                                                                                                                                                                                                                                                                                   | SI-22 |
| Table S2: Molar ratios of different diastereoisomers in solution of complexes <b>4a-d</b> and <b>5a-d</b> as determined by <sup>1</sup> H NMR spectroscopy.                                                                                                                                                                                                                                                                                                         | SI-23 |
| S6: Experimental for X-ray Crystallography                                                                                                                                                                                                                                                                                                                                                                                                                          | SI-24 |
| Table S3: Crystallographic data <i>m</i> -C <sub>6</sub> H <sub>4</sub> (PyT) <sub>2</sub> ( <b>1b</b> ), <i>p</i> -C <sub>6</sub> H <sub>4</sub> (PyT) <sub>2</sub> ( <b>1c</b> ), [Cp*RhCl <sub>3</sub> Cp*][BAr <sup>F</sup> <sub>4</sub> ] ( <b>6</b> ) and [Cp*IrCl <sub>3</sub> Cp*][BAr <sup>F</sup> <sub>4</sub> ] ( <b>7</b> )                                                                                                                             | SI-25 |
| Table S4: Crystallographic data for <i>m</i> -C <sub>6</sub> H <sub>4</sub> [(PyT)Rh(CO) <sub>2</sub> ] <sub>2</sub> [BAr <sup>F</sup> <sub>4</sub> ] <sub>2</sub> ( <b>2b</b> ), <i>p</i> -C <sub>6</sub> H <sub>4</sub> [(PyT)Rh(CO) <sub>2</sub> ] <sub>2</sub> [BAr <sup>F</sup> <sub>4</sub> ] <sub>2</sub> ( <b>2c</b> ) and <i>o</i> -C <sub>6</sub> H <sub>4</sub> [(PyT)RhCp*Cl] <sub>2</sub> [BAr <sup>F</sup> <sub>4</sub> ] <sub>2</sub> ( <b>4a</b> ). | SI-26 |

|                                                                                                                                                                                                                                                                                                                                                         |       |
|---------------------------------------------------------------------------------------------------------------------------------------------------------------------------------------------------------------------------------------------------------------------------------------------------------------------------------------------------------|-------|
| Figure S1: ORTEP depictions of the cationic fragment of the single crystal solid state structures of $[\text{Cp}^*\text{Rh}(\mu\text{-Cl})_3\text{RhCp}^*][\text{BAr}^{\text{F}}_4]$ ( <b>6</b> ) and $[\text{Cp}^*\text{Ir}(\mu\text{-Cl})_3\text{IrCp}^*][\text{BAr}^{\text{F}}_4]$ ( <b>7</b> ) at 40% thermal ellipsoid for the non-hydrogen atoms. | SI-27 |
| References                                                                                                                                                                                                                                                                                                                                              | SI-28 |

## S1. Synthesis of Ligands

### S1.1 Synthesis of *m*-C<sub>6</sub>H<sub>4</sub>(PyT)<sub>2</sub> (**1b**)

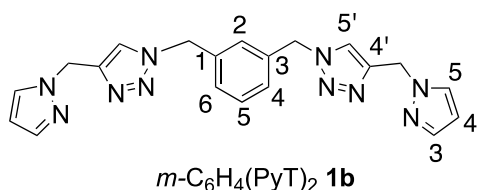

Dimethylsulfoxide (30 mL) was added to a flask containing sodium azide (1.27 g, 21.0 mmol) under an atmosphere of nitrogen and the reaction mixture was stirred at room temperature for 1 hour. 1,3-Bis(bromomethyl)benzene (2.64 g, 20.0 mmol) was added and the yellow solution was stirred overnight. 1-Propargylpyrazole (2.13 g, 20.0 mmol) was then added to the reaction mixture and the reaction mixture was deoxygenated by briefly putting the reaction flask under vacuum and refilling with nitrogen (house vacuum *ca.* 20 mmHg, x3). Sodium L-ascorbate (0.800 g, 4.0 mmol, 40 mol%) and CuSO<sub>4</sub>·5H<sub>2</sub>O (0.250 g, 5.0 mmol, 10 mol%) were added to the reaction mixture and the reaction mixture was stirred overnight at room temperature.

The reaction mixture was poured into a saturated aqueous Na<sub>2</sub>EDTA solution (100 mL), extracted with dichloromethane (3 x 150 mL), washed with saturated aqueous Na<sub>2</sub>EDTA (5 x 30 mL, until the Na<sub>2</sub>EDTA layer became colourless) and water (2 x 30 mL). The organic layer was dried over anhydrous magnesium sulfate, filtered and the solvent was removed *in vacuo* to afford a very pale yellow solid. The crude product was purified by recrystallization from hot methanol to afford the ligand *m*-C<sub>6</sub>H<sub>4</sub>(PyT)<sub>2</sub> (**1b**) as white needle-like crystals. Yield: 3.53 g, 88%; m.p. 159-161 °C.

Elemental analysis, found: C, 59.50; H, 4.99 and N, 35.23; calculated for C<sub>10</sub>H<sub>20</sub>N<sub>10</sub>: C, 59.99; H, 5.03 and N, 34.98%.

ESI-MS (ESI<sup>+</sup>, acetonitrile): *m/z* (% assignment): 423.15 (100, [M+Na]<sup>+</sup>) amu.

<sup>1</sup>H NMR (500 MHz, CDCl<sub>3</sub>): δ 7.52 (d, <sup>3</sup>*J* = 2.2 Hz, 2H, Pz-**H3**), 7.50 (d, <sup>3</sup>*J* = 1.9 Hz, 2H, Pz-**H5**), 7.43 (s, 2H, Tz-**H5'**), 7.35 (t, <sup>3</sup>*J* = 7.6 Hz, 1H, C<sub>6</sub>H<sub>4</sub>-**H5**), 7.20 (dd, <sup>3</sup>*J* = 7.6 Hz, <sup>4</sup>*J* = 1.4 Hz, 2H, *m*-C<sub>6</sub>H<sub>4</sub>-**H4** and **H6**), 7.13 (s, 1H, C<sub>6</sub>H<sub>4</sub>-**H2**), 6.26 (apparent t, <sup>3</sup>*J* = 2.0 Hz, 2H, Pz-**H4**), 5.45 (s, 4H, Tz-NCH<sub>2</sub>), 5.42 (s, 4H, Pz-NCH<sub>2</sub>) ppm.

$^{13}\text{C}\{^1\text{H}\}$  NMR (125 MHz,  $\text{CDCl}_3$ ):  $\delta$  144.20 (Tz-C4'), 139.89 (Pz-C3), 135.51 ( $\text{C}_6\text{H}_4$ -C1 and C3), 130.04 ( $\text{C}_6\text{H}_4$ -C5), 129.50 (Pz-C5), 128.41 ( $\text{C}_6\text{H}_4$ -C4 and C6), 127.54 ( $\text{C}_6\text{H}_4$ -C2), 122.57 (Tz-C5'), 106.12 (Pz-C4), 53.80 (TzN- $\text{CH}_2$ ), 47.38 (Pz-N $\text{CH}_2$ ) ppm.

### SI.2 Synthesis of *p*- $\text{C}_6\text{H}_4(\text{PyT})_2$ (**1c**)

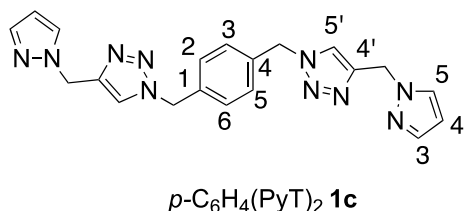

Dimethylsulfoxide (40 mL) was added to a flask containing sodium azide (1.37 g, 21.0 mmol) and the mixture was stirred at room temperature for one hour. 1,4-Bis(bromomethyl)benzene (2.64 g, 10.0 mmol) was then added and the reaction mixture was stirred at room temperature under nitrogen for one day. 1-Propargylpyrazole (2.13 g, 20.0 mmol) was added. The reaction mixture was deoxygenated by briefly putting the reaction flask under vacuum and refilling with nitrogen (house vacuum *ca.* 20 mmHg, x3). Sodium L-ascorbate (0.800 g, 4.00 mmol) and  $\text{CuSO}_4 \cdot 5\text{H}_2\text{O}$  (0.250 g, 1.00 mmol) were added to the reaction mixture and the reaction mixture was stirred at room temperature for 48 hours.

The reaction mixture was poured into an aqueous saturated  $\text{Na}_2\text{EDTA}$  solution with rigorous stirring. A white precipitate formed together with a yellow green solution. The precipitate was collected by filtration, washed with saturated aqueous  $\text{Na}_2\text{EDTA}$  until the filtrate become colourless (15 x 15 mL) and water (5 x 20 mL). The precipitate was air dried and then dried in a vacuum desiccator for two days. Yield: 3.29 g, 82%; m.p. 221-223 °C.

Elemental analysis, found: C, 59.31; H, 4.95; N, 34.59; calculated for  $\text{C}_{10}\text{H}_{20}\text{N}_{10} \cdot 0.25\text{H}_2\text{O}$ : C, 59.32; H, 5.10; N, 34.59 %.

HR-MS ( $\text{ESI}^+$ , MeOH):  $m/z$  (% , assignment): 423.2500 (100,  $[\text{M}+\text{Na}]^+$ ), 401.3333 (10,  $[\text{M}+\text{H}]^+$ ) amu.

$^1\text{H}$  NMR ( $\text{CDCl}_3$ , 600 MHz):  $\delta$  7.51 (d,  $^3J = 2.1$  Hz, 2H, Pz-H5), 7.50 (d,  $^3J = 1.7$  Hz, 2H, Pz-H3), 7.43 (s, 2H, Tz-H5'), 7.24 (s, 4H,  $\text{C}_6\text{H}_4$ -H), 6.25 (apparent t,  $^3J = 1.9$  Hz, 2H, Pz-H4), 5.47 (s, 4H, Tz-N $\text{CH}_2$ ), 5.42 (s, 4H, Pz-N $\text{CH}_2$ ) ppm.

$^{13}\text{C}\{^1\text{H}\}$  NMR ( $\text{CDCl}_3$ , 150 MHz):  $\delta$  144.35 (Tz-C4'), 140.03 (Pz-C3), 135.28 (*ipso*-C of  $\text{C}_6\text{H}_4$ ), 129.63 ( $\text{C}_6\text{H}_4$ -CH), 128.96 (Pz-C5), 122.66 (Tz-C5'), 106.26 (Pz-C4), 53.86 (Tz-NCH<sub>2</sub>), 47.54 (Pz-NCH<sub>2</sub>) ppm.

### SI.3 Synthesis of 1,3,5- $\text{C}_6\text{H}_3(\text{PyT})_3$ (**1d**)

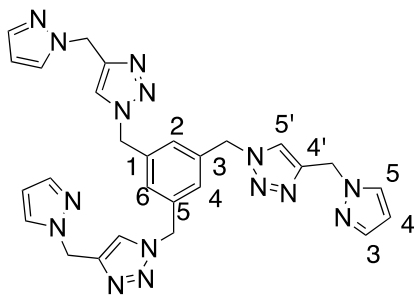

1,3,5- $\text{C}_6\text{H}_3(\text{PyT})_3$  **1d**

Dimethylsulfoxide (30 mL) was added to a flask containing sodium azide (1.07 g, 16.5 mmol) under an atmosphere of nitrogen. The reaction mixture was stirred under nitrogen for 1 hour and 1,3,5-*tris*(bromomethyl)benzene (1.78 g, 5.0 mmol) was added, the brownish yellow solution obtained was stirred at room temperature for three days. 1-Propargylpyrazole (1.59 g, 15.0 mmol) was added and the reaction mixture was deoxygenated by placing it under vacuum and refilling with nitrogen (x3). Sodium L-ascorbate (0.60 g, 3.0 mmol) and  $\text{CuSO}_4 \cdot 5\text{H}_2\text{O}$  (0.187 g, 0.75 mmol) were added to the reaction mixture and the reaction mixture was stirred for one week at room temperature. The reaction mixture was poured into saturated aqueous  $\text{Na}_2\text{EDTA}$  (150 mL) and stirred vigorously for 30 minutes at room temperature. A white solid precipitate formed, together with some brown solid and a yellowish green solution. The mixture was extracted with dichloromethane (5 x 120 mL). The combined organic layer was washed with aqueous saturated  $\text{Na}_2\text{EDTA}$  (5 x 30 mL), water (2 x 30 mL) and dried over anhydrous magnesium sulfate before it was filtered through a pad of Celite. The solvent was removed *in vacuo* to afford an off-white solid.

Yield: 1.59 g, 57%; m.p. 147-149 °C.

Elemental analysis, found: C, 57.47; H, 4.84 and N, 37.48; calculated for  $\text{C}_{27}\text{H}_{27}\text{N}_{15}$ : C, 57.41; H, 4.85 and N, 37.41%.

MS (ESI, MeOH):  $m/z$  (% assignment): 584.20 ( $[\text{M}+\text{Na}]^+$ , 100) amu.

$^1\text{H}$  NMR (400 MHz,  $\text{CDCl}_3$ ):  $\delta$  7.52 (d,  $^3J = 2.1$  Hz, 3H, Pz-**H5**), 7.50 (d,  $^3J = 1.7$  Hz, 3H, Pz-**H3**), 7.45 (s, 3H, Tz-**H5'**), 7.06 (s, 3H,  $\text{C}_6\text{H}_3\text{CH}$ ), 6.25 (apparent t,  $^3J = 1.9$  Hz, 3H, Pz-**H4**), 5.42 (s, 6H, Tz- $\text{NCH}_2$ ), 5.39 (s, 6H, Pz- $\text{NCH}_2$ ) ppm.

$^{13}\text{C}\{^1\text{H}\}$  NMR (100 MHz,  $\text{CDCl}_3$ ):  $\delta$  144.35 (Tz-**C4'**), 139.98 (Pz-**C3**), 136.77 (*ipso*-C of  $\text{C}_6\text{H}_3$ ), 129.74 (Pz-**C5**), 127.78 ( $\text{C}_6\text{H}_3\text{CH}$ ), 122.90 (Tz-**C5'**), 106.26 (Pz-**C4**), 53.43 (Pz- $\text{NCH}_2$ ), 47.39 (Tz- $\text{NCH}_2$ ) ppm.

$^1\text{H}$  NMR (600 MHz,  $\text{dms-}d_6$ ):  $\delta$  8.05 (s, 3H), 7.77 (s, 3H), 7.45 (s, 3H), 7.25 (s, 3H), 6.26 (s, 3H), 5.55 (s, 6H), 5.40 (s, 6H) ppm.

$^{13}\text{C}\{^1\text{H}\}$  NMR (150MHz,  $\text{dms-}d_6$ ):  $\delta$  138.94, 137.11, 129.88, 127.55, 123.88, 105.48, 52.29 and 46.37 ppm.

## S2. Synthesis of $\text{Rh}(\text{CO})_2$ Complexes

### S2.1 Synthesis of $m\text{-C}_6\text{H}_4[(\text{PyT})\text{Rh}(\text{CO})_2]_2[\text{BAr}^{\text{F}}_4]_2$ (**2b**)

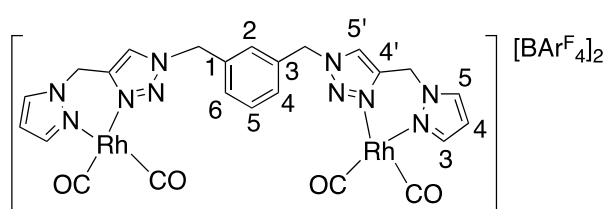

Dichloromethane (25 mL) was added to a flask containing  $[\text{Rh}(\text{Cl})(\text{CO})_2]_2$  (0.039 g, 0.10 mmol) and  $m\text{-C}_6\text{H}_4(\text{PyT})_2$  (**1b**, 0.040 g, 0.10 mmol) under an atmosphere of argon. The pale yellow solution was stirred at room temperature for 45 minutes.  $\text{NaBAr}^{\text{F}}_4$  (0.177 g, 0.20 mmol) was added and the reaction mixture was stirred at room temperature for one hour. The reaction mixture was filtered through a pad of Celite, rinsed with dichloromethane (2 x 15 mL) and the solvent was reduced *in vacuo* until about 3 mL of solvent left. Pentane (30 mL) was added to the reaction mixture with rigorous stirring. The solid and oil mixture obtained was collected by filtration, washed with pentane (2 x 5 mL) and dried *in vacuo* to afford complex **2b** as a bright yellow solid. Yield: 0.225 g, 92%; m.p. 65-70 °C.

MS (MeOH):  $m/z$  (% , assignment): 661.25 (8,  $[\text{M} - 2\text{CO} + \text{H}]^+$ ), 633.01 (12,  $[\text{M} - 3\text{CO} + \text{H}]^+$ ), 503.20 (100,  $[\text{M} - \text{Rh}(\text{CO})_4]^+$ ) amu.

Elemental Analysis, found: C, 43.24; H, 1.83 and N, 5.82; calculated for  $C_{88}H_{44}B_2F_{48}N_{10}O_4Rh_2$ : C, 43.23; H, 1.81; N, 5.73 %.

FT-IR (DCM):  $\nu$  2109 (s,  $\nu_{CO}$ ), 2051 (s,  $\nu_{CO}$ )  $cm^{-1}$ .

$^1H$  NMR (DCM- $d_2$ , 400 MHz):  $\delta$  7.80 (d,  $^3J = 2.2$  Hz, 2H, Pz-H3), 7.73 (s, 2H, Tz-H5'), 7.71 (br m, 16H, *o*-CH of  $BAr^F_4$ ), 7.65 (d,  $^3J = 2.5$  Hz, 2H, Pz-H5), 7.53 (br s, 8H, *p*-CH of  $BAr^F_4$ ), 7.37 (t,  $^3J = 7.5$  Hz, 1H,  $C_6H_4$ -H5), 7.35 (s, 1H,  $C_6H_4$ -H2), 7.28 (dd,  $^3J = 7.5$  Hz,  $^4J = 1.7$  Hz, 2H,  $C_6H_4$ -H4 and H6), 6.51 (apparent t,  $^3J = 2.5$  Hz, 2H, Pz-H4), 5.54 (s, 4H, Tz-NCH<sub>2</sub>), 5.34 (s, 4H, Pz-NCH<sub>2</sub>) ppm.

$^{13}C\{^1H\}$  NMR (DCM- $d_2$ , 100 MHz):  $\delta$  182.46 (d,  $^1J_{Rh-C} = 69.3$  Hz, CO), 181.90 (d,  $^1J_{Rh-C} = 69.9$  Hz, CO), 162.13 (q,  $^1J_{B-C} = 49.5$  Hz), 147.24 (Pz-C3), 140.39 (Tz-C4'), 135.18 (*o*-CH of  $BAr^F_4$ ), ~135.15 (Pz-C5) (last two resonances overlap), 133.52 ( $C_6H_4$ -C5), 131.35 ( $C_6H_4$ -C1 and C3), 130.31 ( $C_6H_4$ -C4 and C6), 129.29 ( $C_6H_4$ -C2), 129.24 (q,  $^2J_{F-C} = 31.0$  Hz, CCH<sub>3</sub>), 124.96 (q,  $^1J = 271.2$  Hz, CF<sub>3</sub>), 123.93 (Tz-C5'), 117.90 (*p*-CH of  $BAr^F_4$ ), 109.07 (Pz-C4), 56.21 (Tz-NCH<sub>2</sub>), 45.67 (Pz-NCH<sub>2</sub>) ppm.

## S2.2 Synthesis of $p\text{-}C_6H_4[(PyT)Rh(CO)_2]_2[BAr^F_4]_2$ (**2c**)

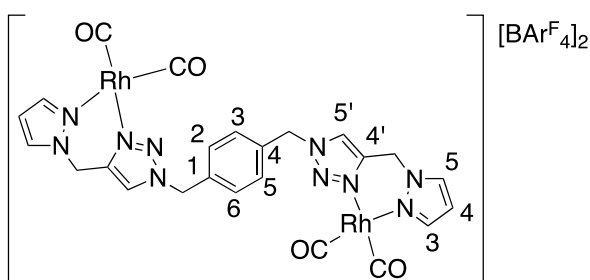

Dichloromethane (25 mL) was added to a flask containing  $[Rh(Cl)(CO)_2]_2$  (0.039 g, 0.10 mmol) and  $p\text{-}C_6H_4(PyT)_2$  (**1c**, 0.040 g, 0.10 mmol) under an atmosphere of argon. The pale yellow

solution was stirred at room temperature for 30 minutes.  $NaBAr^F_4$  (0.177 g, 0.20 mmol) was added and the reaction mixture was stirred at room temperature for one hour. The reaction mixture was filtered through a pad of Celite, rinsed with dichloromethane (2 x 15 mL) and the solvent was reduced to approximately 3 mL. Pentane (30 mL) was added to the reaction mixture with rigorous stirring. The solid and oil mixture obtained was collected by filtration, washed with pentane (2 x 5 mL) and dried *in vacuo* to afford complex **2c** as a pale creamy yellow solid. Yield: 0.193 g, 79%.

m.p. 177-181 °C (melted then decomposed).

Elemental analysis, found: C, 43.51; H, 2.03 and N, 5.40; calculated for  $C_{88}H_{44}B_2F_{48}N_{10}O_4Rh_2$ : C, 43.23; H, 1.81; N, 5.73 %.

HR-MS (MeOH):  $m/z$  (% assignment): 1581.2500 (2,  $[M+BAr^F_4]^+$ ), 559.2500 (8,  $[M-Rh(CO)_2]^+$ ), 531.2500 (12,  $[M-Rh-3 \times CO]^+$ ), 503.1667 (32,  $[M-Rh-4 \times CO]^+$ ) amu.

IR (dcm):  $\nu$  2109 (s,  $\nu_{CO}$ ), 2051 (s,  $\nu_{CO}$ )  $cm^{-1}$ .

$^1H$  NMR (DCM- $d_2$ , 600 MHz):  $\delta$  7.79 (d,  $^3J = 2.5$  Hz, 2H, Pz-H3), 7.72 (br s, 18H, *o*-CH of  $BAr^F_4$  and Tz-H5'), 7.63 (d,  $^3J = 2.5$  Hz, 2H, Pz-H5), 7.54 (br s, 8H, *p*-CH of  $BAr^F_4$ ), 7.31 (s, 4H,  $C_6H_4$ -H), 6.50 (apparent t,  $^3J = 2.5$  Hz, 2H, Pz-H4), 5.52 (s, 4H, Tz-NCH<sub>2</sub>), 5.32 (s, 4H, Pz-NCH<sub>2</sub>) ppm.

$^{13}C\{^1H\}$  NMR (DCM- $d_2$ , 150 MHz):  $\delta$  182.49 (d,  $^1J_{Rh-C} = 69.8$  Hz, CO), 181.82 (d,  $^1J_{Rh-C} = 70.6$  Hz, CO), 162.16 (q,  $^1J_{B-C} = 49.7$  Hz), 147.25 (Pz-C3), 140.395 (Tz-C4'), 135.21 (*o*-CH of  $BAr^F_4$ ), 135.14 (Pz-C5), 133.86 ( $C_6H_4$ -C5), 130.06 ( $C_6H_4$ -CH), 129.28 (q,  $^2J_{F-C} = 31.0$  Hz,  $CCF_3$ ), 124.99 (q,  $^1J = 271.2$  Hz,  $CF_3$ ), 123.94 (Tz-C5'), 117.92 (*p*-CH of  $BAr^F_4$ ), 109.07 (Pz-C4), 56.21 (Tz-NCH<sub>2</sub>), 45.67 (Pz-NCH<sub>2</sub>) ppm.

### S2.3 Synthesis of 1,3,5- $C_6H_3[(PyT)Rh(CO)_2]_3[BAr^F_4]_3$ (2d)

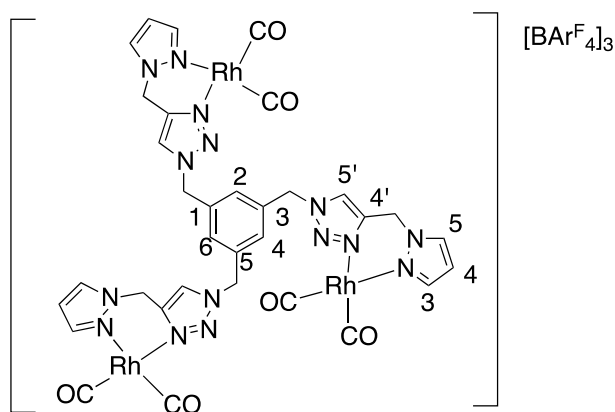

Dichloromethane (25 mL) was added to a flask containing a mixture of  $[RhCl(CO)_2]_2$  (0.042 g, 0.11 mmol) and 1,3,5- $C_6H_3(PyT)_3$  (**1d**, 0.039 g, 0.70 mmol) under argon. The yellow reaction was stirred at room temperature for one hour.  $NaBAr^F_4$  (0.188 g, 2.10 mmol) was added and the reaction mixture went cloudy. The reaction mixture was stirred at room temperature for two hours, filtered through a pad of Celite, rinsed with dichloromethane (3 x 15 mL) and the filtrate was reduced *in vacuo* to approximately 3 mL. Pentane (25 mL) was added to the reaction mixture with rigorous stirring. The oil and solid mixture was collected by filtration and washed with pentane

(3 x 5 mL) and dried *in vacuo* to afford complex **2d** as a yellow solid. Yield: 0.219 g, 86%; m.p. 74-77 °C (melted then decomposed).

Elemental analysis, found: C, 42.98; H, 1.96 and N, 5.78; calculated for C<sub>129</sub>H<sub>63</sub>B<sub>3</sub>F<sub>72</sub>N<sub>15</sub>O<sub>6</sub>Rh<sub>3</sub>: C, 42.71; H, 1.75 and N, 5.79 %.

HRMS (ESI, MeOH): *m/z* (% assignment): 2764.0719 (3, [M + 2 BAr<sup>F</sup><sub>4</sub>]<sup>+</sup>), 1714.1176 (17, [M – Rh(CO)<sub>3</sub> + 2 BAr<sup>F</sup><sub>4</sub>]<sup>+</sup>), 950.5026 (100, [M+BAr<sup>F</sup><sub>4</sub>]<sup>2+</sup>) amu.

FTIR (dcm): ν 2110 (s, νCO), 2052 (s, νCO) ppm.

<sup>1</sup>H NMR (acetone-*d*<sub>6</sub>, 600 MHz): δ 8.72 (s, 3H, Tz-**H5'**), 8.27 (m (two overlapping doublets), <sup>3</sup>*J* = 2.5 Hz, 6H, Pz-**H3** & **H5**), 7.80 (s, 3H, C<sub>6</sub>H<sub>3</sub>-**H**), 7.79 (m, 24H, *o*-CH of BAr<sup>F</sup><sub>4</sub>), 7.67 (s, 12H, *p*-CH of BAr<sup>F</sup><sub>4</sub>), 6.72 (apparent t, <sup>3</sup>*J* = 2.5 Hz, 3H, Pz-**H4**), 5.97 (s, 6H, Tz-NCH<sub>2</sub>), 5.95 (s, 6H, Pz-NCH<sub>2</sub>) ppm.

<sup>13</sup>C {<sup>1</sup>H} NMR (acetone-*d*<sub>6</sub>, 150 MHz): δ 183.8 (d, <sup>1</sup>*J*<sub>Rh-C</sub> = 69.3 Hz, two COs overlapping), 162.52 (q, <sup>1</sup>*J*<sub>B-C</sub> = 50.81 Hz, *ipso*-CB of BAr<sup>F</sup><sub>4</sub>), 147.78 (Pz-C3), 142.00 (Tz-C4'), 136.86 (Pz-C5), 136.75 (*ipso*C of C<sub>6</sub>H<sub>3</sub>), 135.54 (*o*-CH of BAr<sup>F</sup><sub>4</sub>), 130.75 (C<sub>6</sub>H<sub>3</sub>-CH), 130.02 (q, <sup>2</sup>*J*<sub>F-C</sub> = 30.2 Hz, CCF<sub>3</sub>), 126.66 (Tz-C5'), 125.41 (q, <sup>1</sup>*J* = 271.5 Hz, CF<sub>3</sub>), 118.50 (*p*-CH of BAr<sup>F</sup><sub>4</sub>), 108.99 (Pz-C4), 55.81 (Tz-NCH<sub>2</sub>), 46.09 (Pz-NCH<sub>2</sub>) ppm.

### S3. Synthesis of Ir(CO)<sub>2</sub> Complexes

#### S3.1 Synthesis of *m*-C<sub>6</sub>H<sub>4</sub>[(PyT)Ir(CO)<sub>2</sub>]<sub>2</sub>[BAr<sup>F</sup><sub>4</sub>]<sub>2</sub> (**3b**)

Dichloromethane (25 mL) was added to a mixture of *m*-C<sub>6</sub>H<sub>4</sub>(PyT)<sub>2</sub> (**1b**, 0.040 g, 0.10 mmol) and [IrCl(COD)]<sub>2</sub> (0.067 g, 0.10 mmol) under argon. The bright yellow solution was stirred at RT for 30 minutes and NaBAr<sup>F</sup><sub>4</sub> (0.178 g, 0.10 mmol) was added. The cloudy yellow solution was stirred at RT at 1 hour, filtered through a pad of Celite and rinsed with dichloromethane (2 x 20 mL). The combined organic layer was deoxygenated *via* freeze-pump-thaw (x2) and

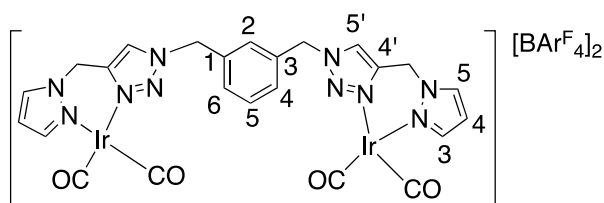

Dichloromethane (25 mL) was added to a mixture of *m*-C<sub>6</sub>H<sub>4</sub>(PyT)<sub>2</sub> (**1b**, 0.040 g, 0.10 mmol) and [IrCl(COD)]<sub>2</sub> (0.067 g, 0.10 mmol) under

was placed under an atmosphere of carbon monoxide and stirred overnight. The solvent was reduced to approximately 3 mL and pentane (35 mL) was added to the reaction mixture with vigorous stirring. The yellow solid and thick oil residue obtained was collected by filtration, washed with pentane (3 x 7 mL) and dried *in vacuo* to afford **3b** as an orangish yellow solid. Yield: 0.203 g, 81%; m.p. 70-80 °C (slowly decomposed).

HR-MS (MeOH): *m/z* (% assignment): 1761.1578 (5, [M+BAr<sup>F</sup><sub>4</sub>]<sup>+</sup>), 649.1384 (100, [M - Ir(CO)<sub>2</sub>]<sup>+</sup>) amu.

Elemental analysis, found: C, 40.80; H, 1.75 and N, 5.60; calculated for C<sub>88</sub>H<sub>44</sub>B<sub>2</sub>F<sub>48</sub>Ir<sub>2</sub>N<sub>10</sub>O<sub>4</sub>: C, 40.29; H, 1.69; N, 5.34 %.

FT-IR (DCM):  $\nu$  2098 (s,  $\nu$ CO), 2034 (s,  $\nu$ CO) cm<sup>-1</sup>.

<sup>1</sup>H NMR (DCM-*d*<sub>2</sub>, 600 MHz):  $\delta$  7.96 (d, <sup>3</sup>*J* = 2.5 Hz, 2H, Pz-**H3**), 7.80 (s, 2H, Tz-**H5'**), 7.71 (br m, 18H, *o*-CH of BAr<sup>F</sup><sub>4</sub> and Pz-**H5**), 7.54 (br s, 8H, *p*-CH of BAr<sup>F</sup><sub>4</sub>), 7.40 (t, <sup>3</sup>*J* = 7.5 Hz, 1H, C<sub>6</sub>H<sub>4</sub>-**H5**), 7.39 (s, 1H, C<sub>6</sub>H<sub>4</sub>-**H2**), 7.32 (dd, <sup>3</sup>*J* = 7.5 Hz, <sup>4</sup>*J* = 1.7 Hz, 2H, C<sub>6</sub>H<sub>4</sub>-**H4** and **H6**), 6.60 (apparent t, <sup>3</sup>*J* = 2.5 Hz, 2H, Pz-**H4**), 5.57 (s, 4H, Tz-NCH<sub>2</sub>), 5.34 (s, 4H, Pz-NCH<sub>2</sub>) ppm.

<sup>13</sup>C {<sup>1</sup>H} NMR (DCM-*d*<sub>2</sub>, 150 MHz):  $\delta$  170.31 (CO), 169.18 (CO), 162.16 (q, <sup>1</sup>*J*<sub>B-C</sub> = 49.5 Hz, *ipso*-C of BAr<sup>F</sup><sub>4</sub>), 147.24 (Pz-C3), 140.06 (Tz-C4'), 135.79 (Pz-C5), 135.20 (*o*-CH of BAr<sup>F</sup><sub>4</sub>), 133.23 (C<sub>6</sub>H<sub>4</sub>-C1 and C3), 131.49 (C<sub>6</sub>H<sub>4</sub>-C5), 130.61 (C<sub>6</sub>H<sub>4</sub>-C4 and C6), 129.50 (C<sub>6</sub>H<sub>4</sub>-C2), 129.25 (q, <sup>2</sup>*J*<sub>F-C</sub> = 30.9 Hz, CCH<sub>3</sub>), 124.97 (q, <sup>1</sup>*J* = 271.2 Hz, CF<sub>3</sub>), 124.24 (Tz-C5'), 117.93 (*p*-CH of BAr<sup>F</sup><sub>4</sub>), 109.78 (Pz-C4), 56.56 (Tz-NCH<sub>2</sub>), 45.85 (Pz-NCH<sub>2</sub>) ppm.

### S3.2 Synthesis of *p*-C<sub>6</sub>H<sub>3</sub>[(PyT)Ir(CO)<sub>2</sub>]<sub>2</sub>[BAr<sup>F</sup><sub>4</sub>]<sub>2</sub> (**3c**)

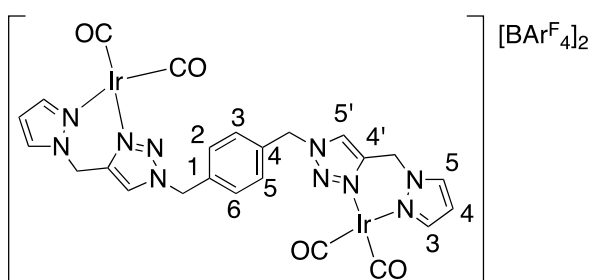

Dichloromethane (25 mL) was added to a mixture of *p*-C<sub>6</sub>H<sub>3</sub>(PyT)<sub>2</sub> (**1c**, 0.040 g, 0.10 mmol) and [IrCl(COD)]<sub>2</sub> (0.067 g, 0.10 mmol) under argon. The bright yellow solution was stirred at RT for 30 minutes and NaBAr<sup>F</sup><sub>4</sub> (0.180 g, 0.10 mmol) was

added. The cloudy yellow solution was stirred at RT at 1 hour, filtered through a pad of Celite and rinsed with dichloromethane (2 x 25 mL). The combined organic layer was deoxygenated *via* freeze-pump-thaw (x2) and was placed under an atmosphere of carbon monoxide and stirred overnight. The solvent was reduced to approximately 3 mL and pentane (35 mL) was added to the reaction mixture with vigorous stirring. The pale yellow solid and thick oil residue obtained was collected by filtration, washed with pentane (3 x 7 mL) and dried *in vacuo* to afford **3c** as an orange solid. Yield: 0.209 g, 83%; m.p. 69-72 °C (melted and turned red).

Elemental analysis, found: C, 40.59; H, 1.82 and N, 5.28; calculated for C<sub>88</sub>H<sub>44</sub>B<sub>2</sub>F<sub>48</sub>Ir<sub>2</sub>N<sub>10</sub>O<sub>4</sub>: C, 40.29; H, 1.82; N, 5.28 %.

HR-MS (MeOH): *m/z* (% assignment): 1759.1558 (67, [M+BAr<sup>F</sup><sub>4</sub>]<sup>+</sup>), 649.1382 (100, [M-Ir(CO)<sub>2</sub>]<sup>+</sup>), amu.

FT-IR (DCM):  $\nu$  2099 (s,  $\nu$ CO), 2034 (s,  $\nu$ CO) cm<sup>-1</sup>.

<sup>1</sup>H NMR (acetone-*d*<sub>6</sub>, 600 MHz):  $\delta$  8.80 (s, 2H, Pz-**H5'**), 8.40 (s, 2H, Pz-**H3**), 8.36 (s, 2H, Pz-**H5**), 7.78 (br m, 16H, *o*-CH of BAr<sup>F</sup><sub>4</sub>), 7.67 (br s, 8H, *p*CH of BAr<sup>F</sup><sub>4</sub>), 7.60 (s, 4H, C<sub>6</sub>H<sub>4</sub>-**H**), 6.79 (s, 2H, Pz-**H4**), 6.04 (s, 4H, Tz-NCH<sub>2</sub>), 6.00 (s, 4H, Pz-NCH<sub>2</sub>) ppm.

<sup>13</sup>C{<sup>1</sup>H} NMR (acetone-*d*<sub>6</sub>, 150 MHz):  $\delta$  172.15 (CO), 171.40 (CO), 162.58 (q, <sup>1</sup>J<sub>B-C</sub> = 49.9 Hz, *ipso*-C-B of BAr<sup>F</sup><sub>4</sub>), 148.57 (Pz-**C3**), 141.84 (Tz-**C4'**), 135.52 (*o*-CH of BAr<sup>F</sup><sub>4</sub>, **C1** & **C4**), 130.36 (C<sub>6</sub>H<sub>4</sub>-CH), 130.00 (q, <sup>2</sup>J<sub>F-C</sub> = 31.0 Hz, CCF<sub>3</sub>), 126.87 (Tz-**C5'**), 125.53 (q, <sup>1</sup>J = 271.4 Hz, CF<sub>3</sub>), 118.46 (*p*-CH of BAr<sup>F</sup><sub>4</sub>), 109.45 (Pz-**C4**), 56.18 (Tz-NCH<sub>2</sub>), 46.35 (Pz-NCH<sub>2</sub>) ppm.

### S3.3 Synthesis of 1,3,5-C<sub>6</sub>H<sub>3</sub>-(PyT)Ir(CO)<sub>2</sub>]<sub>3</sub>[BAr<sup>F</sup><sub>4</sub>]<sub>3</sub> (**3d**)

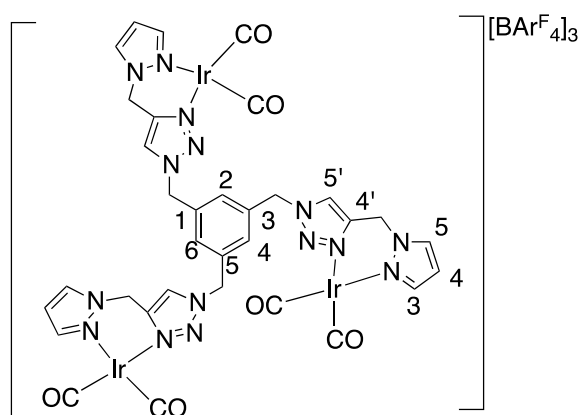

Dichloromethane (25 mL) was added to a mixture of 1,3,5-C<sub>6</sub>H<sub>3</sub>(PyT)<sub>3</sub> (**1d**, 0.393 g, 0.70 mmol) and [IrCl(COD)]<sub>2</sub> (0.071 g, 1.05 mmol) in a flask under an atmosphere of argon. The bright orange yellow solution obtained was stirred at room temperature.

SI-12

temperature for 30 minutes. NaBAr<sup>F</sup><sub>4</sub> (0.187 g, 2.10 mmol) was added and the cloudy yellow reaction mixture was stirred for one hour at room temperature. The reaction mixture was filtered through a pad of Celite and rinsed with dichloromethane (2 x 20 mL). The combined filtrate was reduced until about 25 mL of solvent was left. The solution was then degassed *via* three cycles of freeze-pump-thaw and placed under an atmosphere of carbon monoxide overnight. The reaction mixture was degassed again and placed under carbon monoxide for 3 hours. The solvent was reduced to approximately 3 mL and pentane (30 mL) was added to the reaction mixture with vigorous stirring. The yellow orange solid and thick oil residue obtained was collected by filtration, washed with pentane (3 x 10 mL) and dried *in vacuo* to afford the product as an orange solid. Yield: 0.249 g, 91%; m.p. 77-80 °C.

Elemental analysis, found: C, 40.26; H, 1.49 and N, 5.10; calculated for: C<sub>129</sub>H<sub>63</sub>B<sub>3</sub>Ir F<sub>72</sub>N<sub>15</sub>O<sub>6</sub>: C, 39.77; H, 1.63 and N, 5.39 %.

MS (ESI, MeOH): *m/z* (% assignment): 1695.49 (40, [M-2Ir(CO)<sub>2</sub> + NaBAr<sup>F</sup><sub>4</sub>]<sup>+</sup>), 810.26 (100, [M-2Ir(CO)<sub>2</sub>]<sup>+</sup> amu).

FT-IR (DCM):  $\nu$  2099 (s,  $\nu$ CO), 2035 (s,  $\nu$ CO) cm<sup>-1</sup>.

<sup>1</sup>H NMR (DCM-*d*<sub>2</sub>, 400 MHz):  $\delta$  7.91 (d, <sup>3</sup>*J* = 2.5 Hz, 3H, Pz-**H**3), 7.80 (s, 3H, Tz-**H**5'), 7.71 (br m, 24H, *o*-CH of BAr<sup>F</sup><sub>4</sub>), 7.67 (d, <sup>3</sup>*J* = 2.6 Hz, 3H, Pz-**H**3), 7.53 (br s, 12H, *p*-CH of BAr<sup>F</sup><sub>4</sub>), 7.37 (s, 3H, C<sub>6</sub>H<sub>3</sub>-**H**), 6.56 (apparent t, <sup>3</sup>*J* = 2.5 Hz, 3H, Pz-**H**4), 5.43 (s, 6H, Tz-NCH<sub>2</sub>), 5.34 (s, 6H, Pz-NCH<sub>2</sub>) ppm.

<sup>13</sup>C {<sup>1</sup>H} NMR (DCM-*d*<sub>2</sub>, 150 MHz):  $\delta$  169.86 (CO), 169.41 (CO), 162.11 (q, <sup>1</sup>*J*<sub>B-C</sub> = 49.5 Hz, *ipso*-CB of BAr<sup>F</sup><sub>4</sub>), 148.30 (Pz-C3), 140.26 (Tz-C4'), 135.74 (Pz-C5), 135.16 (*o*-CH of BAr<sup>F</sup><sub>4</sub>), 134.74 (*ipso*-C of C<sub>6</sub>H<sub>3</sub>), 130.80 (C<sub>6</sub>H<sub>3</sub>-CH), 129.20 (q, <sup>2</sup>*J*<sub>F-C</sub> = 30.6 Hz, CCF<sub>3</sub>), 126.27 (Tz-C5'), 124.91 (q, <sup>1</sup>*J*<sub>F-C</sub> = 272.5 Hz, CF<sub>3</sub>), 117.91 (*p*-CH of BAr<sup>F</sup><sub>4</sub>), 109.82 (Pz-C4), 55.73 (Tz-NCH<sub>2</sub>), 45.59 (Pz-NCH<sub>2</sub>) ppm.

## S4. Synthesis of RhCp\* Complexes

### S4.1 Synthesis of *m*-C<sub>6</sub>H<sub>4</sub>-(PyT)Rh(Cp\*)Cl]<sub>2</sub>[BAr<sup>F</sup><sub>4</sub>]<sub>2</sub> (**4b**)

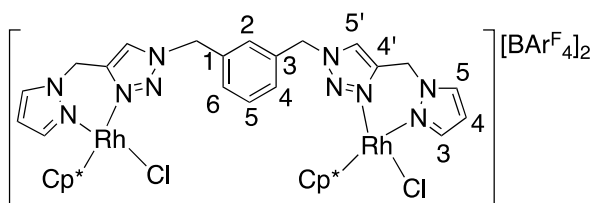

Dichloromethane (25 mL) was added to a flask containing a solid mixture of *m*-C<sub>6</sub>H<sub>4</sub>(PyT)<sub>2</sub> (**1b**, 0.040 g, 0.10 mmol), [Rh(Cp\*)Cl]<sub>2</sub> (0.062 g, 0.10 mmol) and NaBAr<sup>F</sup><sub>4</sub> (0.178 g, 0.20 mmol)

under argon. The slightly cloudy orange solution obtained was stirred at RT for 3 hours. The reaction mixture was filtered through a pad of Celite and rinsed with dichloromethane (2 x 15 mL). The combined filtrate was reduced to approximately 3 mL and pentane (30 mL) was added to the reaction mixture with rigorous stirring. The bright yellow precipitate formed was collected by filtration, washed with pentane (2 x 5 mL) and dried *in vacuo*. Yield: 0.232 g, 87%; m.p. 98-103 °C. The product is a mixture of two diastereoisomers, **I1** and **I2** (**I1** : **I2** = 1.37 : 1.00).

Elemental analysis, found: C, 47.16; H, 2.93; and N, 5.18; calculated for: C<sub>104</sub>H<sub>74</sub>B<sub>2</sub>Cl<sub>2</sub>F<sub>48</sub>N<sub>10</sub>Rh<sub>2</sub>: C, 46.71, H, 2.93 and N, 5.24 %.

HR-MS (MeOH): *m/z* (% assignment): 1809.3334 (3, [M + BAr<sup>F</sup><sub>4</sub>]<sup>+</sup>), 673.3334 (33, [M-RhCp\*Cl]<sup>+</sup>), 637.4167 (23, [M-RhCp\*Cl]<sub>2</sub><sup>+</sup>), 473.2500 (16, [M]<sup>2+</sup>) amu.

<sup>1</sup>H NMR (DCM-*d*<sub>2</sub>, 400 MHz): δ 7.82 (**I1**, s, 2H, Tz-**H5'**), 7.81 (**I2**, s, 2H, Tz-**H5'**), 7.73-7.70 (**I1** + **I2**, m, 18H + 18H, *o*-CH of BAr<sup>F</sup><sub>4</sub> (16H) and Pz-**H5**), 7.64 (**I1**, d, <sup>3</sup>*J* = 2.5 Hz, Pz-**H3**), 7.56-7.54 (br s and d (overlapped), 8H + 8H + 2H, *p*-CH of BAr<sup>F</sup><sub>4</sub> (**I1** + **I2**) and Pz-**H3** (**I2**)), 7.42-7.40 (**I1** + **I2**, m, 2H + 2H, C<sub>6</sub>H<sub>4</sub>-**H4** and **H6**), 7.38-7.33 (**I1** + **I2**, m, 1H + 1H, C<sub>6</sub>H<sub>4</sub>-**H5**), 7.28 (**I2**, s, 1H, C<sub>6</sub>H<sub>4</sub>-**H2**), 7.21 (**I1**, s, 1H, C<sub>6</sub>H<sub>4</sub>-**H2**), 6.49 (**I2**, t, <sup>3</sup>*J* = 2.5 Hz, 2H, Pz-**H4**), 6.45 (**I1**, t, <sup>3</sup>*J* = 2.5 Hz, 2H, Pz-**H4**), 5.73-5.67 (**I1** + **I2**, m, 2H + 2H, CH<sub>2</sub>), 5.56-5.42 (**I1** + **I2**, m, 4H + 4H, CH<sub>2</sub>), 5.0 (**I2**, d, <sup>3</sup>*J* = 16.2 Hz, Pz-NCH<sub>2</sub>), 4.94 (**I1**, d, <sup>3</sup>*J* = 15.7 Hz, Pz-NCH<sub>2</sub>) ppm.

<sup>13</sup>C{<sup>1</sup>H} NMR (DCM-*d*<sub>2</sub>, 100 MHz): δ 162.13 (**I1** + **I2**, q, <sup>1</sup>*J*<sub>B-C</sub> = 50.0 Hz, *ipso*-C-B of BAr<sup>F</sup><sub>4</sub>), 145.44 (**I1**, Pz-C3), 145.30 (**I2**, Pz-C3), 140.13 (**I1** + **I2**, Tz-C4'), 135.19 (**I1** + **I2**, *o*-CH of BAr<sup>F</sup><sub>4</sub>),

134.84, 134.74, 134.46, 134.29, 130.99, 130.91, 130.19, 130.06, 129.25 (q,  $^2J_{\text{B-C}} = 31.0$  Hz,  $\text{CCF}_3$ ), 124.97 (q,  $^1J_{\text{B-C}} = 272.1$  Hz,  $\text{CF}_3$ ), 124.62 (**I1**, Tz-C5'), 124.50 (**I2**, Tz-C5'), 117.88 (br s, *p*-CH  $\text{BAr}^{\text{F}}_4$ ) ppm.

#### S4.2 Synthesis of *p*-C<sub>6</sub>H<sub>4</sub>[(PyT)Rh(Cp\*)Cl]<sub>2</sub>[BAr<sup>F</sup><sub>4</sub>]<sub>2</sub> (**4c**)

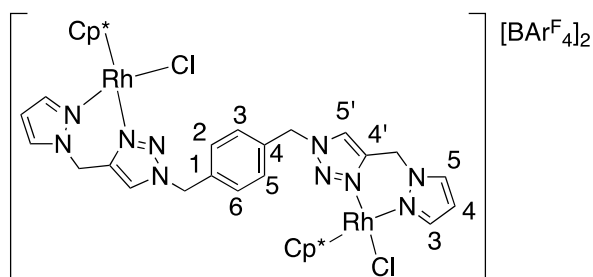

Dichloromethane (20 mL) was added to a mixture of *p*-C<sub>6</sub>H<sub>4</sub>(PyT)<sub>2</sub> (**1c**, 0.040 g, 0.10 mmol) and [RhCp\*Cl<sub>2</sub>]<sub>2</sub> (0.062 g, 0.10 mmol) in a flask under argon. The bright orange solution obtained was stirred at RT for 30 minutes. NaBAr<sup>F</sup><sub>4</sub> (0.177

g, 0.20 mmol) was added and the reaction mixture was stirred at RT for 3 hours. The reaction mixture was filtered through a pad of Celite and rinsed with dichloromethane (2 x 15mL). The combined dichloromethane solution was reduced to approximately 3 mL and pentane (30 mL) was added with stirring. The solid obtained was collected by filtration and was washed with pentane (3 x 5mL) and dried *in vacuo*. *p*-C<sub>6</sub>H<sub>4</sub>[(PyT)RhCp\*Cl]<sub>2</sub>[BAr<sup>F</sup><sub>4</sub>]<sub>2</sub> (**4c**) was obtained as a bright orangish yellow solid. Yield: 0.237 g, 89%; m.p. 102-106 °C. The product is a mixture of two diastereoisomers, **I1** and **I2** (**I1** : **I2** = 1.00 : 1.00).

Elemental analysis; found: C, 47.00; H, 2.75 and N, 5.19; calculated for: C<sub>104</sub>H<sub>74</sub>B<sub>2</sub>Cl<sub>2</sub>F<sub>48</sub>N<sub>10</sub>Rh<sub>2</sub>: C, 46.71, H, 2.93 and N, 5.24 %.

HR-MS (MeOH): *m/z* (% assignment): 1809.4167 (20, [M + BAr<sup>F</sup><sub>4</sub>]<sup>+</sup>), 673.3333 (72, [M-RhCp\*Cl]<sup>+</sup>), 637.4167 (100, [M-RhCp\*Cl<sub>2</sub>]<sup>+</sup>), 473.2500 (43, [M]<sup>2+</sup>) amu.

<sup>1</sup>H NMR (DCM-*d*<sub>2</sub>, 600 MHz): δ 7.76 (**I1**, d,  $^3J = 2.5$  Hz, 2H, Pz-**H3**), 7.75 (**I2**, d,  $^3J = 2.5$  Hz, 2H, Pz-**H3**), 7.65 (**I1** + **I2**, s, 2H + 2H, Tz-**H5'**), 7.61 (**I1**, d,  $^3J = 2.5$  Hz, 2H, Pz-**H5**), 7.59 (**I2**, d,  $^3J = 2.5$  Hz, Pz-**H5**), 7.58 (br s, 8H, *p*-CH of BAr<sup>F</sup><sub>4</sub>), 7.312 (**I1**, s, 4H, C<sub>6</sub>H<sub>4</sub>-CH), 7.310 (**I2**, s, 4H, C<sub>6</sub>H<sub>4</sub>-CH), 5.69 (**I1** + **I2**, d,  $^2J = 15.0$  Hz, 1H + 1H, Tz-NCHH), 5.55 (**I1** + **I2**, d,  $^2J = 15.0$  Hz, 1H + 1H, Tz-NCH), 5.46 (**I1**, d,  $^2J = 15.8$  Hz, 1H, Pz-NCH), 5.45 (**I2**, d,  $^2J = 15.8$  Hz, 1H, Pz-NCH),

5.00 (**I1**, d,  $^2J = 15.8$  Hz, 1H, Pz-NCH<sub>b</sub>), 4.99 (**I1**, d,  $^2J = 15.8$  Hz, 1H, Pz-NCH<sub>b</sub>), 1.641 (**I1**, s, 15H, CH<sub>3</sub>), 1.637 (**I2**, s, 15H, CH<sub>3</sub>) ppm.

$^{13}\text{C}\{^1\text{H}\}$  NMR (DCM-*d*<sub>2</sub>, 150 MHz):  $\delta$  162.16 (**I1** + **I2**, q,  $^1J_{\text{B-C}} = 50.0$  Hz, *ipso*-CB of BAr<sup>F</sup><sub>4</sub>), 145.49 (**I1** + **I2**, Pz-C3), 140.18 (**I1** + **I2**, Tz-C4'), 135.22 (*o*-CH of BAr<sup>F</sup><sub>4</sub>), 134.70 (Pz-C5), 134.39 (**I1**, *ipso*-C of C<sub>6</sub>H<sub>4</sub>), 134.36 (**I2**, *ipso*-C of C<sub>6</sub>H<sub>4</sub>), 129.80 (**I1** + **I2**, CH of C<sub>6</sub>H<sub>4</sub>), 129.29 (**I1** + **I2**, q,  $^2J_{\text{F-C}} = 31.7$  Hz, CCF<sub>3</sub>), 125.00 (**I1** + **I2**, q,  $^1J_{\text{F-C}} = 271.7$  Hz, CF<sub>3</sub>), 124.10 (**I1** + **I2**, Tz-C5' (overlapped with the CF<sub>3</sub> quartet), 117.91 (*p*-CH of BAr<sup>F</sup><sub>4</sub>), 109.21 (**I1**, Pz-C4), 109.20 (**I2**, Pz-C4), 97.65 (**I1** + **I2**, d,  $^1J_{\text{Rh-C}} = 8.7$  Hz, CCH<sub>3</sub>), 55.91 (**I1** + **I2**, Tz-NCH<sub>2</sub>), 45.28 (**I1** + **I2**, Pz-NCH<sub>2</sub>), 9.46 (CH<sub>3</sub>) ppm.

#### S4.3 Synthesis of 1,3,5-C<sub>6</sub>H<sub>3</sub>[(PyT)Rh(Cp\*)Cl]<sub>3</sub>[BAr<sup>F</sup><sub>4</sub>]<sub>3</sub> (**4d**)

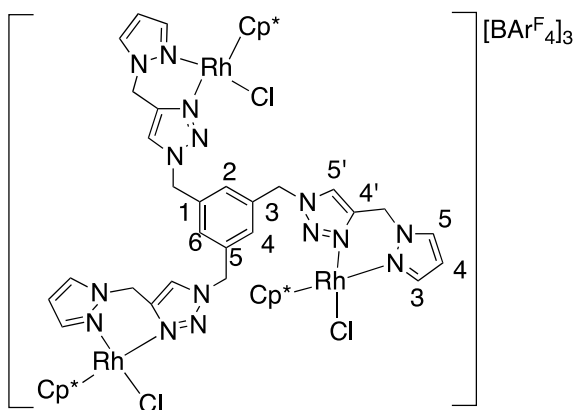

Dichloromethane (20 mL) was added to a mixture of 1,3,5-C<sub>6</sub>H<sub>3</sub>[(PyT)<sub>3</sub> (**1d**, 0.028 g, 0.050 mmol) and [RhCp\*Cl<sub>2</sub>]<sub>2</sub> (0.0464 g, 0.750 mmol) in a flask and the resulting orange solution was stirred at RT for 30 minutes. NaBAr<sup>F</sup><sub>4</sub> (0.133 g, 1.50 mmol) was added to the reaction mixture and the mixture

was stirred at RT for 1.5 hours. The mixture was filtered through a pad of Celite and rinsed with dichloromethane (2 x 15 mL). The yellow solution obtained was reduced to approximately 2 mL and pentane (30 mL) was added with rigorous stirring. The yellow solid and thick solid residue was collected by filtration, washed with pentane (3 x 5 mL) and dried *in vacuo*. 1,3,5-C<sub>6</sub>H<sub>3</sub>[(PyT)Rh(Cp\*)Cl]<sub>3</sub> [BAr<sup>F</sup><sub>4</sub>]<sub>3</sub> (**4d**) was obtained as a yellow orange solid. Yield: 0.199 g, 85%. m.p. 103-106 °C. The product is a mixture of three diastereoisomers in ratio: **I1** : **I2** : **I3** = 1.00 : 1.79 : 1.26.

Elemental analysis; found: C, 46.78; H, 2.68; N, 5.58; calculated for C<sub>153</sub>H<sub>108</sub>B<sub>3</sub>Cl<sub>3</sub>F<sub>72</sub>N<sub>15</sub>Rh<sub>3</sub>: 46.27; H, 2.74 and N, 5.58 %.

HR-MS (MeOH):  $m/z$  (% assignment): 3108.3592 (3,  $[M+2\text{BAr}^{\text{F}}_4]^+$ ), 1970.3040 (4,  $[M-\text{RhCp}^*\text{Cl}+\text{BAr}^{\text{F}}_4]^+$ ), 1122.6465 (100,  $[M+\text{BAr}^{\text{F}}_4]^{2+}$ ), 460.0782 (6,  $[M]^{3+}$ ) amu.

$^1\text{H}$  NMR (acetone- $d_6$ , 600 MHz):  $\delta$  8.50 (**I1**, s, 3H), 8.48 (**I2**, s, 3H), 8.33 (**I3**, s, 3H), 8.13 (**I1**, d,  $^3J = 2.3$  Hz, 3H, Pz-**H5**), 8.08 (**I2**, d,  $^3J = 2.3$  Hz, 3H, Pz-**H5**), 8.01 (**I3**, d,  $^3J = 2.3$  Hz, 3H, Pz-**H5**), 7.95-7.94 (**I1** + **I2** + **I3**, m, 3H + 3H + 3H, Pz-**H3**), 7.79 (**I1** + **I2** + **I3**, br m, 24H + 24H + 24H, *o*-CH of  $\text{BAr}^{\text{F}}_4$ ), 7.70 (**I1**, s, 3H,  $\text{C}_6\text{H}_3$ -CH), 7.67 (br s, *p*-CH of  $\text{BAr}^{\text{F}}_4$ ), 7.66 (**I2**, s, 3H,  $\text{C}_6\text{H}_3$ -CH), 7.55 (**I3**, s, 3H,  $\text{C}_6\text{H}_3$ -CH), 6.62-6.60 (m, 3H + 3H + 3H, Pz-**H4**), 6.10-5.88 (**I1** + **I2** + **I3**, m, 18H + 9H, Tz-NCH<sub>2</sub> and Pz-NCH<sub>a</sub>), 5.39 (**I1**, d,  $^2J = 16.2$  Hz, 3H, Pz-NCH<sub>b</sub>), 5.37 (**I1**, d,  $^2J = 16.2$  Hz, 3H, Pz-NCH<sub>b</sub>), 5.34 (**I3**, d,  $^2J = 16.2$  Hz, 3H, Pz-NCH<sub>b</sub>) ppm.

$^{13}\text{C}\{^1\text{H}\}$  NMR (acetone- $d_6$ , 150 MHz):  $\delta$  162.60 (q,  $^1J_{\text{B-C}} = 162.6$  Hz, *ipso*-C of  $\text{BAr}^{\text{F}}_4$ ), 145.96, 145.93, 145.86 (last three resonances **I1/I2/I3**, Pz-C3), 141.45, 141.41, 141.39 (last three resonances **I1/I2/I3**, Tz-C4'), 137.33, 137.26 (*ipso*-C of  $\text{C}_6\text{H}_3$ ), 136.06, 135.97, 135.91 ((last three resonances **I1/I2/I3**,  $\text{C}_6\text{H}_3$ -CH), 135.55 (br s, *o*-CH of  $\text{BAr}^{\text{F}}_4$ ), 130.40 (**I1** + **I2** + **I3**, s, *ipso*-C of  $\text{C}_6\text{H}_3$ ), 130.02 (**I1** + **I2** + **I3**, q,  $^2J_{\text{F-C}} = 29.7$  Hz,  $\text{CCF}_3$ ), 126.27 (**I1**, Tz-C5'), 126.18 (**I2**, Tz-C5'), 126.03 (**I3**, Tz-C5'), 125.39 (q,  $^1J_{\text{F-C}} = 271.3$  Hz,  $\text{CF}_3$ ), 118.45 (**I1** + **I2** + **I3**, *p*-CH of  $\text{BAr}^{\text{F}}_4$ ), 108.91 (**I1/I3**, Pz-C4), 108.86 (**I2**, Pz-C4), 108.73 (**I3/I1**, Pz-C4), 98.06, 98.02 (three resonances for **I1** + **I2** + **I3**,  $\text{CCH}_3$ ), 55.46, 55.43, 55.37 (last three resonances, Tz-NCH<sub>2</sub>), 45.77 (br, **I1** + **I2** + **I3**, Pz-NCH<sub>2</sub>), 9.39, 9.34 (last two resonances **I1/I2** and **I3**,  $\text{CH}_3$ ) ppm.

## S5. Synthesis of IrCp\* Complexes

### S5.1 Synthesis of *m*-C<sub>6</sub>H<sub>4</sub>[(PyT)Ir(Cp\*)Cl]<sub>2</sub>[BAr<sup>F</sup><sub>4</sub>]<sub>2</sub> (**5b**)

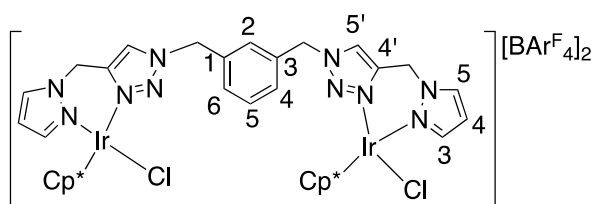

Dichloromethane (25 mL) was added to a mixture of *m*-C<sub>6</sub>H<sub>4</sub>(PyT)<sub>2</sub> (**1b**, 0.040 g, 0.10 mmol) and [IrCp\*Cl<sub>2</sub>]<sub>2</sub> (0.080 g, 0.10 mmol) in a flask.

The yellow reaction mixture was stirred for 45 minutes at room temperature. NaBAr<sup>F</sup><sub>4</sub> (0.178 g, 0.20 mmol) was added and the cloudy yellow solution was stirred at RT under argon overnight.

The reaction mixture was filtered through a pad of Celite and rinsed with dichloromethane (2 x 15 mL). The combined organic layer was reduced to approximately 3mL and pentane (30 mL) was added to the dichloromethane solution with rigorous stirring. The yellow thick oil and solid residue was collected by filtration, washed with pentane (2 x 5mL) and dried *in vacuo*. *m*-C<sub>6</sub>H<sub>4</sub>[(PyT)Ir(Cp\*)Cl]<sub>2</sub>[BAr<sup>F</sup><sub>4</sub>]<sub>2</sub> (**5b**) was collected as a bright yellow solid. Yield: 0.159 g, 91%; m.p. 99-102 °C. The product is a mixture of two diastereoisomers **I1** and **I2** (**I1** : **I2** = 1.00 : 1.08).

Elemental analysis; found: C, 43.91; H, 2.62 and N, 4.90; calculated for C<sub>104</sub>H<sub>74</sub>B<sub>2</sub>Cl<sub>2</sub>F<sub>48</sub>Ir<sub>2</sub>N<sub>10</sub>: C, 43.79, H, 2.61 and N, 4.91 %.

HR-MS (ESI<sup>+</sup>, MeOH): *m/z* (% assignment): 1990.3334 (1, [M + BAr<sup>F</sup><sub>4</sub>]<sup>+</sup>), 763.3334 (12, [M-IrCp\*Cl]<sup>+</sup>), 747.2500 (17, [M-IrCp\*Cl<sub>2</sub> + H<sub>2</sub>O]<sup>+</sup>), 657.4167 (100, [M-IrCl-2xCp\* + OMe]<sup>+</sup>) amu.

<sup>1</sup>H NMR (acetone-*d*<sub>6</sub>, 600 MHz): δ 8.54 (**I1**, s, 2H, Tz-**H5'**), 8.49 (**I2**, s, 2H, Tz-**H5'**), 8.12 (**I1**, d, <sup>3</sup>*J* = 2.4 Hz, 2H, Pz-**H5**), 8.08 (**I2**, d, <sup>3</sup>*J* = 2.4 Hz, 2H, Pz-**H5**), 7.89 (**I1** + **I2**, br s, 2H + 2H, Pz-**H3**), 7.80 (**I1** + **I2**, br m, 16H + 16H, *o*-CH of BAr<sup>F</sup><sub>4</sub>), 7.68 (**I1** + **I2**, br s, 8H + 8H, *p*-CH of BAr<sup>F</sup><sub>4</sub>), 7.64 (**I1/I2**, s, 1H, C<sub>6</sub>H<sub>4</sub>-**H2**), 7.60 (**I1/I2**, s, 1H, C<sub>6</sub>H<sub>4</sub>-**H2**), 7.51-7.49 (**I1** + **I2**, m, 3H + 3H, **H4**, **H5** and **H6** of C<sub>6</sub>H<sub>4</sub>), 6.64-6.63 (**I1** + **I2**, apparent t, <sup>3</sup>*J* = 2.4 Hz, 2H + 2H, Pz-**H4**), 6.13-5.88 (**I1** + **I2**, m, 6H + 6H, NCH<sub>2</sub> (AB systems)), 5.262 (**I1**, d, <sup>2</sup>*J* = 16.1 Hz, 2H, Pz-NCHb), 5.255 (**I2**, d, <sup>2</sup>*J* = 16.1 Hz, 2H, Pz-NCH), 1.72 (**I1**, s, 15H, CH<sub>3</sub>), 1.69 (**I2**, s, 15H, CH<sub>3</sub>) ppm.

<sup>13</sup>C{<sup>1</sup>H} NMR (acetone-*d*<sub>6</sub>, 150 MHz): δ 162.62 (**I1** + **I2**, q, <sup>1</sup>*J*<sub>B-C</sub> = 49.5 Hz, *ipso*-CB of BAr<sup>F</sup><sub>4</sub>), 145.80 (**I2**, Pz-C3), 145.75 (**I1**, Pz-C3), 140.57 (**I2**, Tz-C4'), 140.56 (**I1**, Tz-C4'), 136.38 (**I1/I2**, Tz-C5'), 136.30 (**I1/I2**, Tz-C5'), 135.63 (**I1** and/or **I2**, Pz-C5), 135.57 (**I1** + **I2**, *o*-CH of BAr<sup>F</sup><sub>4</sub>), 130.81 (**I1/I2**, *ipso*-CH of C<sub>6</sub>H<sub>4</sub>), 130.06 (q, <sup>2</sup>*J*<sub>F-C</sub> = 31.9 Hz, CCF<sub>3</sub>), 129.96 ((**I1/I2**, CH of C<sub>6</sub>H<sub>4</sub> (overlapped with CCF<sub>3</sub> resonances)), 129.59 (**I1** + **I2** *ipso*-C of C<sub>6</sub>H<sub>4</sub>), 129.44 (*ipso*-C of C<sub>6</sub>H<sub>4</sub>), 126.05 (**I1/I2**, Tz-C5'), 126.04 (**I1/I2**, Tz-C5'), 125.40 (**I1** + **I2**, q, <sup>1</sup>*J*<sub>F-C</sub> = 271.2 Hz, CF<sub>3</sub>), 118.47 (*p*-CH of BAr<sup>F</sup><sub>4</sub>), 89.80 (**I2**, CCH<sub>3</sub>), 89.78 (**I1**, CCH<sub>3</sub>), 55.88 (**I1** + **I2**, Tz-NCH<sub>2</sub>), 46.18 (**I1** + **I2**, Pz-NCH<sub>2</sub>), 9.10 (**I1/I2**, CH<sub>3</sub>), 9.07 (**I2/I1**, CH<sub>3</sub>) ppm.

## S5.2 Synthesis of $p\text{-C}_6\text{H}_4[(\text{PyT})\text{Ir}(\text{Cp}^*)\text{Cl}]_2[\text{BAr}^{\text{F}}_4]_2$ (**5c**)

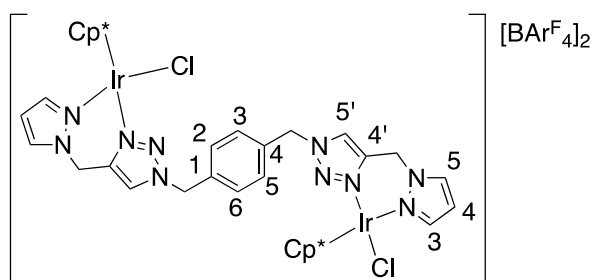

Dichloromethane (20 mL) was added to a mixture of  $p\text{-C}_6\text{H}_4(\text{PyT})_2$  (**1c**, 0.040 g, 0.10 mmol) and  $[\text{IrCp}^*\text{Cl}_2]_2$  (0.080 g, 0.10 mmol) in a flask and the yellow reaction mixture was stirred for 30

minutes at RT.  $\text{NaBAr}^{\text{F}}_4$  (0.178 g, 0.20 mmol) was added and the cloudy yellow solution was stirred at RT under argon for 1hr. The reaction mixture was filtered through a pad of Celite and rinsed with dichloromethane (2 x 15 mL). The combined organic layer was reduced to approximately 3mL and pentane (30 mL) was added to the dichloromethane solution with rigorous stirring. The yellow precipitate formed was collected by filtration, washed with pentane (2 x 5mL) and dried *in vacuo*.  $p\text{-C}_6\text{H}_4[(\text{PyT})\text{Ir}(\text{Cp}^*)\text{Cl}]_2[\text{BAr}^{\text{F}}_4]_2$  (**5c**) was collected as a light yellow solid. Yield: 0.285g, 95%; m.p. 103-108 °C. The product is a mixture of two diastereomers **I1** and **I2** (**I1** : **I2** = 1.00 : 1.00).

Elemental analysis; found: C, 44.00; H, 2.62 and N, 4.90; calculated for  $\text{C}_{104}\text{H}_{74}\text{B}_2\text{Cl}_2\text{F}_{48}\text{Ir}_2\text{N}_{10}$ : C, 43.79, H, 2.61 and N, 4.91 %.

HR-MS ( $\text{ESI}^+$ , MeOH):  $m/z$  (% , assignment): 1989.3509 (32,  $[\text{M} + \text{BAr}^{\text{F}}_4]^+$ ), 763.2343 (7,  $[\text{M} - \text{IrCp}^*\text{Cl}]$ ), 563.1402 (100,  $[\text{M}]^{2+}$ ) amu.

$^1\text{H}$  NMR ( $\text{DCM}-d_2$ , 600 MHz):  $\delta$  7.73-7.72 (**I1** + **I2**, br m, 16H + 16H, *o*-CH of  $\text{BAr}^{\text{F}}_4$ ), 7.70 (**I1** + **I2**, apparent t,  $^3J = 2.5$  Hz, 2H + 2H, Pz-H5), 7.66 (**I1** + **I2**, s, 2H + 2H, Tz-H5'), 7.61 (**I1**, d,  $^3J = 2.5$  Hz, 2H, Pz-H3), 7.59 (**I2**, d,  $^3J = 2.5$  Hz, 2H, Pz-H3), 7.56 (br s, 8H + 8H, *p*-CH of  $\text{BAr}^{\text{F}}_4$ ), 7.31 (**I1** + **I2**, s, 4H + 4H, CH of  $\text{C}_6\text{H}_4$ ), 6.53 (**I1**, apparent t,  $^3J = 2.5$  Hz, 2H, Pz-H4), 6.52 (**I2**, apparent t,  $^3J = 2.5$  Hz, Pz-H4), 5.70 (**I1** + **I2**, d,  $^2J = 15.2$  Hz, 2H + 2H, Tz-NCH<sub>a</sub>), 5.57 (**I1** + **I2**, d,  $^2J = 15.2$  Hz, 2H + 2H, Tz-NCH<sub>b</sub>), 5.425 (**I1**, d,  $^2J = 15.8$  Hz, 2H, Tz-NCH<sub>a</sub>), 5.419 (**I2**, d,  $^2J = 15.8$  Hz, 2H, Tz-NCH<sub>a</sub>), 4.86 (**I1** + **I2**, d,  $^2J = 15.8$  Hz, 2H + 2H, Tz-NCH<sub>b</sub>), 1.61 (**I1**, s, 15H, CCH<sub>3</sub>), 1.60 (**I1**, s, 15H, CCH<sub>3</sub>) ppm.

$^{13}\text{C}\{^1\text{H}\}$  NMR ( $\text{DCM-}d_2$ , 150 MHz):  $\delta$  162.15 (**I1** + **I2**, q,  $^1J_{\text{B-C}} = 50.0$  Hz, *ipso*-CB of  $\text{BAr}^{\text{F}}_4$ ), 145.49 (**I1** + **I2**, Pz-C3), 139.26 (Tz-C4'), 135.21 (br s, *o*-CH of  $\text{BAr}^{\text{F}}_4$ ), 134.34 (**I1** + **I2**, Pz-C5), 129.77 (**I1** + **I2**, *ipso*-C of  $\text{C}_6\text{H}_4$ ), 129.28 (**I1** + **I2**, d,  $^2J_{\text{F-C}} = 31.7$  Hz,  $\text{CCF}_3$ ), 125.00 (**I1** + **I2**, q,  $^1J_{\text{F-C}} = 272.5$  Hz,  $\text{CF}_3$ ), 123.98 (**I1** + **I2**, Tz-C5'), 117.91 (**I1** + **I2**, s, *p*-CH of  $\text{BAr}^{\text{F}}_4$ ), 89.63 (**I1** + **I2**,  $\text{CCH}_3$ ), 56.04 (**I1** + **I2**, Tz-NCH<sub>2</sub>), 45.59 (**I1** + **I2**, Pz-NCH<sub>2</sub>), 9.20 (**I1** + **I2**, CH<sub>3</sub>) ppm.

### S5.3 Synthesis of $1,3,5\text{-C}_6\text{H}_3[(\text{PyT})\text{Ir}(\text{Cp}^*)\text{Cl}]_3[\text{BAr}^{\text{F}}_4]_3$ (**5d**)

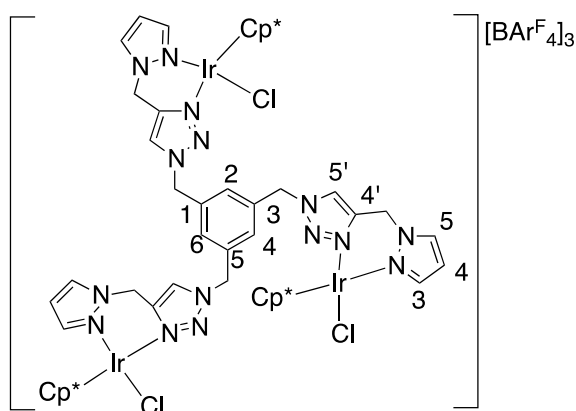

Dichloromethane (25 mL) was added to a mixture of  $1,3,5\text{-C}_6\text{H}_3(\text{PyT})_3$  (**1d**, 0.039 g, 0.070 mmol) and  $[\text{IrCp}^*\text{Cl}_2]_2$  (0.084 g, 0.105 mmol) in a flask and the yellow reaction mixture was stirred for 30 minutes at room temperature.  $\text{NaBAr}^{\text{F}}_4$  (0.187 g, 0.210 mmol) was added and the cloudy yellow

solution was stirred at RT under argon for 1 hour. The reaction mixture was filtered through a pad of Celite and rinsed with dichloromethane (2 x 15 mL). The combined organic layer was reduced to approximately 3mL and pentane (30 mL) was added to with rigorous stirring. The yellow precipitate formed was collected by filtration, washed with pentane (2 x 5mL) and dried *in vacuo*.  $1,3,5\text{-C}_6\text{H}_3[(\text{PyT})\text{Ir}(\text{Cp}^*)\text{Cl}]_3[\text{BAr}^{\text{F}}_4]_3$  (**5d**) was collected as a light yellow solid. Yield: 0.235 g, 93%; m.p. 126-132 °C. The product is a mixture of three diastereoisomers, **I1**, **I2** and **I3** (**I1** : **I2** : **I3** = 1.00 : 1.92 : 1.29).

Elemental analysis; found: C, 43.38; H, 2.56; and N, 5.09. Calculated for  $\text{C}_{153}\text{H}_{108}\text{B}_3\text{Cl}_3\text{F}_{72}\text{Ir}_3\text{N}_{15}$ : C, 43.34, H, 2.57 and N, 4.98 %.

HR-MS (MeOH): *m/z* (% assignment): 3376.5320 (4,  $[\text{M} + 2\text{BAr}^{\text{F}}_4]^+$ ), 2150.4193 (3,  $[\text{M} - \text{IrCp}^*\text{Cl} + \text{BAr}^{\text{F}}_4]^+$ ), 1256.7327 (100,  $[\text{M} + \text{BAr}^{\text{F}}_4]^{2+}$ ), 550.1322 (8,  $[\text{M}]^{3+}$ ) amu.

$^1\text{H}$  NMR (acetone- $d_6$ , 600 MHz):  $\delta$  8.56 (**I1**, s, 3H, Tz-H5'), 8.52 (**I2**, s, 3H, Tz-H5'), 8.42 (**I3**, s, 3H, Tz-H5'), 8.15 (**I1**, d,  $^3J = 2.5$  Hz, 3H, Pz-H5), 8.11 (**I2**, d,  $^3J = 2.5$  Hz, 3H, Pz-H5), 8.06 (**I3**, d,

$^3J = 2.5$  Hz, 3H, Pz-**H5**), 7.91-7.89 (**I1** + **I2** + **I3**, m, 3H + 3H + 3H, Pz-**H3**), 7.79 (**I1** + **I2** + **I3**, br m, 16H + 16H + 16H, *o*-CH of BAr<sup>F</sup><sub>4</sub>), 7.69 (**I1**, s, **3H**, C<sub>6</sub>H<sub>3</sub>-**H**), 7.68 (**I2**, s, **3H**, C<sub>6</sub>H<sub>3</sub>-**H**), 7.67 (br s, 4H + 4H + 4H, *p*-CH of BAr<sup>F</sup><sub>4</sub>), 7.60 (**I3**, s, **3H**, C<sub>6</sub>H<sub>3</sub>-**H**), 6.66-6.64 (**I1** + **I2** + **I3**, m, 3H + 3H + 3H, Pz-**H4**), 6.16-5.84 (**I1** + **I2** + **I3**, m, 18H + 9H, Tz-NCH<sub>2</sub> and Pz-NCH<sub>a</sub>), 5.25-5.19 (**I1** + **I2** + **I3**, three doublets, 3H + 3H + 3H, Pz-NCH<sub>b</sub>), 1.74 (**I3**, 15H, CH<sub>3</sub>), 1.71 (**I2**, 15H, CH<sub>3</sub>), 1.64 (**I1**, 15H, CH<sub>3</sub>) ppm.

<sup>13</sup>C{<sup>1</sup>H} NMR (acetone-*d*<sub>6</sub>, 150 MHz):  $\delta$  162.61 (**I1** + **I2** + **I3**,  $^1J_{B-C} = 50.0$  Hz, *ipso*-CB of BAr<sup>F</sup><sub>4</sub>), 145.80 (**I1**, Pz-C3), 145.75 (**I2**, Pz-C3), 145.69 (**I3**, Pz-C3), 140.57 (**I1**, Tz-C4'), 140.54 (**I2**, Tz-C4'), 140.50 (**I3**, Tz-C4'), 137.32 (**I1/I2/I3**, *ipso*-C of C<sub>3</sub>H<sub>6</sub>), 137.29 (**I1/I2/I3**, *ipso*-C of C<sub>3</sub>H<sub>6</sub>), 137.23 (**I1/I2/I3**, *ipso*-C of C<sub>3</sub>H<sub>6</sub>), 135.78 (**I1**, Pz-C5), 135.70 (**I2**, Pz-C5), 135.64 (**I2**, Pz-C5), 135.55 (*p*-CH of BAr<sup>F</sup><sub>4</sub>), 130.46 (**I1**, CH of C<sub>6</sub>H<sub>3</sub>), 130.34 (**I2**, CH of C<sub>6</sub>H<sub>3</sub>), 130.05 (**I3**, CH of C<sub>6</sub>H<sub>3</sub>), 130.02 (**I1** + **I2** + **I3**, q,  $^2J_{F-C} = 31.4$  Hz, CCF<sub>3</sub>), 126.27 (**I1**, Tz-C5'), 126.19 (**I2**, Tz-C5'), 126.04 (**I3**, Tz-C5'), 125.39 (**I1** + **I2** + **I3**, q,  $^1J_{F-C} = 271.8$  Hz, CF<sub>3</sub>), 118.46 (**I1** + **I2** + **I3**, *p*-CH of BAr<sup>F</sup><sub>4</sub>), 109.19 (**I1**, Pz-C4), 109.14 (**I2**, Pz-C4), 109.03 (**I3**, Pz-C4), 89.90 (**I1**, CCH<sub>3</sub>), 89.88 (**I2**, CCH<sub>3</sub>), 89.81 (**I3**, CCH<sub>3</sub>), 55.58, 55.51 (last two Tz-NCH<sub>2</sub>, two resonances overlap), 46.21, 46.17 (last two Pz-NCH<sub>2</sub>, two resonances overlap), 9.15, 9.10 (last two CH<sub>3</sub>, two resonances overlap) ppm.

**Table S1:**  $\nu_{\text{CO}}$  ( $\text{cm}^{-1}$ )<sup>a</sup> and  $\delta$  (ppm) of the carbonyls co-ligands in complexes **2a-d** and **3a-d**.

| Complex                                                                                                                                          | $\nu_{\text{CO}}$ ( $\text{cm}^{-1}$ ) | $^{13}\text{CO}$ $\delta$ (ppm)                             |
|--------------------------------------------------------------------------------------------------------------------------------------------------|----------------------------------------|-------------------------------------------------------------|
| $[\text{Rh}(\text{PyT})(\text{CO})_2][\text{BAr}^{\text{F}}_4]^{\text{d}}$                                                                       | 2108, 2050                             | 182.8 ( $J = 68.9$ Hz), 182.0 ( $J = 71.5$ Hz) <sup>b</sup> |
| <i>o</i> -C <sub>6</sub> H <sub>4</sub> [Rh(PyT)(CO) <sub>2</sub> ] <sub>2</sub> [BAr <sup>F</sup> <sub>4</sub> ] <sub>2</sub> ( <b>2a</b> )     | 2109, 2051                             | 183.76 ( $J = 70$ ) <sup>c</sup>                            |
| <i>m</i> -C <sub>6</sub> H <sub>4</sub> [Rh(PyT)(CO) <sub>2</sub> ] <sub>2</sub> [BAr <sup>F</sup> <sub>4</sub> ] <sub>2</sub> ( <b>2b</b> )     | 2109, 2051                             | 182.46 ( $J = 69.3$ ), 181.90 ( $J = 69.9$ ) <sup>b</sup>   |
| <i>p</i> -C <sub>6</sub> H <sub>4</sub> [Rh(PyT)(CO) <sub>2</sub> ] <sub>2</sub> [BAr <sup>F</sup> <sub>4</sub> ] <sub>2</sub> ( <b>2c</b> )     | 2109, 2051                             | 182.49 ( $J = 69.0$ ), 181.82 ( $J = 70.6$ ) <sup>b</sup>   |
| <i>1,3,5</i> -C <sub>6</sub> H <sub>3</sub> [Rh(PyT)(CO) <sub>2</sub> ] <sub>3</sub> [BAr <sup>F</sup> <sub>4</sub> ] <sub>3</sub> ( <b>2d</b> ) | 2110, 2052                             | 183.8 ( $J = 69.7$ ) <sup>c</sup>                           |
| $[\text{Ir}(\text{PyT})(\text{CO})_2][\text{BAr}^{\text{F}}_4]^{\text{d}}$                                                                       | 2097, 2034                             | 170.7, 169.2 <sup>b</sup>                                   |
| <i>o</i> -C <sub>6</sub> H <sub>4</sub> [Ir(PyT)(CO) <sub>2</sub> ] <sub>2</sub> [BAr <sup>F</sup> <sub>4</sub> ] <sub>2</sub> ( <b>3a</b> )     | 2099, 2034                             | 171.88, 171.20 <sup>c</sup>                                 |
| <i>o</i> -C <sub>6</sub> H <sub>4</sub> [Ir(PyT)(CO) <sub>2</sub> ] <sub>2</sub> [BAr <sup>F</sup> <sub>4</sub> ] <sub>2</sub> ( <b>3b</b> )     | 2098, 2034                             | 170.31, 169.18 <sup>b</sup>                                 |
| <i>o</i> -C <sub>6</sub> H <sub>4</sub> [Rh(PyT)(CO) <sub>2</sub> ] <sub>2</sub> [BAr <sup>F</sup> <sub>4</sub> ] <sub>2</sub> ( <b>3c</b> )     | 2099, 2034                             | 172.14, 171.40 <sup>c</sup>                                 |
| <i>1,3,5</i> -C <sub>6</sub> H <sub>3</sub> [Rh(PyT)(CO) <sub>2</sub> ] <sub>3</sub> [BAr <sup>F</sup> <sub>4</sub> ] <sub>3</sub> ( <b>3d</b> ) | 2099, 2035                             | 169.86, 169.41 <sup>b</sup>                                 |

<sup>a</sup> Spectra were acquired in dcm solution. <sup>b</sup> Spectra were acquired in dcm-*d*<sub>2</sub>. <sup>c</sup> Spectra were acquired in acetone-*d*<sub>6</sub>. <sup>d</sup> From reference 1

**Table S2:** Molar ratios of different diastereoisomers in solution of complexes **4a-d** and **5a-d** as determined by  $^1\text{H}$  NMR spectroscopy.

| Complexes                                                                                                                           | Solvent                        | Diastereoisomeric Ratios |
|-------------------------------------------------------------------------------------------------------------------------------------|--------------------------------|--------------------------|
| <i>o</i> -C <sub>6</sub> H <sub>4</sub> [(PyT)RhCp*Cl] <sub>2</sub> [BAr <sup>F</sup> <sub>4</sub> ] <sub>2</sub> ( <b>4a</b> )     | acetone- <i>d</i> <sub>6</sub> | 1.16 : 1.00              |
| <i>m</i> -C <sub>6</sub> H <sub>4</sub> [(PyT)RhCp*Cl] <sub>2</sub> [BAr <sup>F</sup> <sub>4</sub> ] <sub>2</sub> ( <b>4b</b> )     | dcm- <i>d</i> <sub>2</sub>     | 1.37 : 1.00              |
| <i>p</i> -C <sub>6</sub> H <sub>4</sub> [(PyT)RhCp*Cl] <sub>2</sub> [BAr <sup>F</sup> <sub>4</sub> ] <sub>2</sub> ( <b>4c</b> )     | dcm- <i>d</i> <sub>2</sub>     | 1.00 : 1.00              |
| <i>l</i> ,3,5-C <sub>6</sub> H <sub>3</sub> [(PyT)RhCp*Cl] <sub>2</sub> [BAr <sup>F</sup> <sub>4</sub> ] <sub>2</sub> ( <b>4d</b> ) | acetone- <i>d</i> <sub>6</sub> | 1.00 : 1.79 : 1.26       |
| <i>o</i> -C <sub>6</sub> H <sub>4</sub> [(PyT)IrCp*Cl] <sub>2</sub> [BAr <sup>F</sup> <sub>4</sub> ] <sub>2</sub> ( <b>5a</b> )     | acetone- <i>d</i> <sub>6</sub> | 1.00 : 1.00              |
| <i>m</i> -C <sub>6</sub> H <sub>4</sub> [(PyT)IrCp*Cl] <sub>2</sub> [BAr <sup>F</sup> <sub>4</sub> ] <sub>2</sub> ( <b>5b</b> )     | acetone- <i>d</i> <sub>6</sub> | 0.93 : 1.00              |
| <i>p</i> -C <sub>6</sub> H <sub>4</sub> [(PyT)IrCp*Cl] <sub>2</sub> [BAr <sup>F</sup> <sub>4</sub> ] <sub>2</sub> ( <b>5c</b> )     | dcm- <i>d</i> <sub>2</sub>     | 1.00 : 1.00              |
| <i>l</i> ,3,5-C <sub>6</sub> H <sub>4</sub> [(PyT)IrCp*Cl] <sub>2</sub> [BAr <sup>F</sup> <sub>4</sub> ] <sub>2</sub> ( <b>5d</b> ) | acetone- <i>d</i> <sub>6</sub> | 1.00 : 1.92 : 1.29       |

## S6. Experimental for X-ray Crystallography

**Bruker Diffractometer:** Suitable single crystals of **1c**, **2b**, **4a**, **6** and **7** selected under the polarizing microscope (Leica M165Z), were picked up on a MicroMount (MiTeGen, USA) consisting of a thin polymer tip with a wicking aperture. The X-ray diffraction measurements were carried out on a Bruker kappa-II CCD diffractometer at 150 K by using graphite-monochromated Mo-K $\alpha$  radiation ( $\lambda = 0.710723$  Å). The single crystals, mounted on the goniometer using cryo loops for intensity measurements, were coated with paraffin oil and then quickly transferred to the cold stream using an Oxford Cryo stream attachment. Symmetry related absorption corrections using the program SADABS<sup>2</sup> were applied and the data were corrected for Lorentz and polarisation effects using Bruker APEX2 software.<sup>3</sup> All structures were solved by direct methods and the full-matrix least-square refinements were carried out using SHELXL.<sup>4</sup> The non-hydrogen atoms were refined anisotropically. The molecular graphic was generated using Mercury.<sup>5</sup> Key crystallographic data and refinement details are presented in the Tables S3 and S4.

**Synchrotron:** The X-ray diffraction measurement for **1b** and **1c** was carried out at MX1 and MX2 beamlines at the Australian Synchrotron Facility, Melbourne. The procedure for diffraction intensity measurements on both the beam lines was similar. The crystal was mounted on the goniometer using cryo loop for diffraction measurements, was coated with paraffin oil and then quickly transferred to the cold stream using Cryo stream attachment. Data was collected using Si<111> monochromated synchrotron X-ray radiation ( $\lambda = 0.71073$  Å) at 100(2) K and was corrected for Lorentz and polarization effects using the XDS software.<sup>6</sup> The structure was solved by Direct methods and the full-matrix least-squares refinements was carried out using SHELXL.<sup>4</sup>

**Table S3:** Crystallographic data *m*-C<sub>6</sub>H<sub>4</sub>(PyT)<sub>2</sub> (**1b**), *p*-C<sub>6</sub>H<sub>4</sub>(PyT)<sub>2</sub> (**1c**), [Cp\*Rh( $\mu$ -Cl)<sub>3</sub>Cp\*][BAR<sup>F</sup><sub>4</sub>] (**6**) and [Cp\*Ir( $\mu$ -Cl)<sub>3</sub>Cp\*][BAR<sup>F</sup><sub>4</sub>] (**7**)

|                                                                | <b>1b<sup>a</sup></b>                           | <b>1c</b>                                       | <b>6</b>                                                                         | <b>7</b>                                                                         |
|----------------------------------------------------------------|-------------------------------------------------|-------------------------------------------------|----------------------------------------------------------------------------------|----------------------------------------------------------------------------------|
| Chemical formula                                               | C <sub>20</sub> H <sub>20</sub> N <sub>10</sub> | C <sub>20</sub> H <sub>20</sub> N <sub>10</sub> | C <sub>52</sub> H <sub>42</sub> BCl <sub>3</sub> F <sub>24</sub> Rh <sub>2</sub> | C <sub>52</sub> H <sub>42</sub> BCl <sub>3</sub> F <sub>24</sub> Ir <sub>2</sub> |
| M (g mol <sup>-1</sup> )                                       | 400.46                                          | 400.46                                          | 1445.83                                                                          | 3248.83                                                                          |
| Crystal system                                                 | Orthorhombic                                    | Monoclinic                                      | Triclinic                                                                        | Triclinic                                                                        |
| Space group                                                    | <i>Pnma</i>                                     | <i>P2<sub>1</sub>/c</i>                         | <i>P</i> <sup>-</sup> 1                                                          | <i>P</i> <sup>-</sup> 1                                                          |
| Crystal habit                                                  | Colourless needles                              | Colourless needles                              | Yellow orange plates                                                             | Yellow cubic                                                                     |
| Temperature (K)                                                | 100                                             | 181                                             | 150                                                                              | 150                                                                              |
| a (Å)                                                          | 10.140(2)                                       | 21.252(4)                                       | 10.8624(7)                                                                       | 10.9964(3)                                                                       |
| b (Å)                                                          | 41.977(8)                                       | 4.4589(9)                                       | 12.9587(10)                                                                      | 13.0959(4)                                                                       |
| c (Å)                                                          | 4.4970(9)                                       | 10.309(2)                                       | 19.9534(15)                                                                      | 20.2446(6)                                                                       |
| $\alpha$ (°)                                                   | 90                                              | 90                                              | 89.701(4)                                                                        | 84.849(1)                                                                        |
| $\beta$ (°)                                                    | 90                                              | 100.184(9)                                      | 82.578(4)                                                                        | 82.289(1)                                                                        |
| $\gamma$ (°)                                                   | 90                                              | 90                                              | 82.676(4)                                                                        | 82.375(1)                                                                        |
| V (Å <sup>3</sup> )                                            | 1914.1(7)                                       | 961.5(3)                                        | 2762.3(3)                                                                        | 2863.13(14)                                                                      |
| Z                                                              | 4                                               | 2                                               | 2                                                                                | 1                                                                                |
| Radiation type                                                 | Synchrotron, $\lambda$ = 0.71073 Å              | MoK $\alpha$                                    | MoK $\alpha$                                                                     | MoK $\alpha$                                                                     |
| $\mu$ (mm <sup>-1</sup> )                                      | 0.09                                            | 0.09                                            | 0.86                                                                             | 4.90                                                                             |
| Crystal size (mm)                                              | 0.04 x 0.02 x 0.01                              | 0.30 × 0.12 × 0.05                              | 0.30 × 0.16 × 0.07                                                               | 0.33 × 0.28 × 0.18                                                               |
| T <sub>min</sub> , T <sub>max</sub>                            | -                                               | 0.973, 0.996                                    |                                                                                  | 0.299, 0.479                                                                     |
| Refl. measured                                                 | 20945                                           | 6785                                            | 58653                                                                            | 40446                                                                            |
| Unique reflections                                             | 1695                                            | 1696                                            | 9711                                                                             | 9927                                                                             |
| Obsd. Reflections                                              | 1630                                            | 1398                                            | 7917                                                                             | 8868                                                                             |
| [I > 2 $\sigma$ (I)]                                           |                                                 |                                                 |                                                                                  |                                                                                  |
| R <sub>int</sub>                                               | 0.042                                           | 0.027                                           | 0.039                                                                            | 0.028                                                                            |
| R[F <sup>2</sup> > 2 $\sigma$ (F <sup>2</sup> )]               | 0.076                                           | 0.036                                           | 0.039                                                                            | 0.035                                                                            |
| wR(F <sup>2</sup> )                                            | 0.179                                           | 0.122                                           | 0.129                                                                            | 0.076                                                                            |
| S                                                              | 1.21                                            | 0.80                                            | 0.88                                                                             | 1.05                                                                             |
| Reflections used                                               | 1695                                            | 1696                                            | 9711                                                                             | 9927                                                                             |
| Parameters                                                     | 140                                             | 137                                             | 839                                                                              | 851                                                                              |
| Restraints                                                     | 0                                               | 0                                               | 0                                                                                | 0                                                                                |
| $\Delta\rho_{\max}$ , $\Delta\rho_{\min}$ (e Å <sup>-3</sup> ) | 0.43, -0.33                                     | 0.18 -0.15                                      | 0.93,-0.69                                                                       | 1.49, -0.83                                                                      |

<sup>a</sup> Diffractometer: 3BM1 Australian Synchrotron diffractometer.

**Table S4:** Crystallographic data for *m*-C<sub>6</sub>H<sub>4</sub>[(PyT)Rh(CO)<sub>2</sub>][BAR<sup>F</sup><sub>4</sub>]<sub>2</sub> (**2b**), *p*-C<sub>6</sub>H<sub>4</sub>[(PyT)Rh(CO)<sub>2</sub>]<sub>2</sub>[BAR<sup>F</sup><sub>4</sub>]<sub>2</sub> (**2c**) and *o*-C<sub>6</sub>H<sub>4</sub>[(PyT)RhCp\*Cl]<sub>2</sub>[BAR<sup>F</sup><sub>4</sub>]<sub>2</sub> (**4a**).

|                                                            | <b>2b</b>                                                                                                                                                                            | <b>2c<sup>a</sup></b>                                                                                                                            | <b>4a</b>                                                                                                                                         |
|------------------------------------------------------------|--------------------------------------------------------------------------------------------------------------------------------------------------------------------------------------|--------------------------------------------------------------------------------------------------------------------------------------------------|---------------------------------------------------------------------------------------------------------------------------------------------------|
| Chemical formula                                           | C <sub>24</sub> H <sub>20</sub> N <sub>10</sub> O <sub>4</sub> Rh <sub>2</sub><br>C <sub>64</sub> H <sub>24</sub> F <sub>48</sub> B <sub>2</sub><br>2CH <sub>2</sub> Cl <sub>2</sub> | C <sub>24</sub> H <sub>20</sub> N <sub>10</sub> O <sub>4</sub> Rh <sub>2</sub><br>C <sub>64</sub> H <sub>24</sub> F <sub>48</sub> B <sub>2</sub> | C <sub>40</sub> H <sub>50</sub> Cl <sub>2</sub> N <sub>10</sub> Rh <sub>2</sub><br>C <sub>64</sub> H <sub>24</sub> F <sub>48</sub> B <sub>2</sub> |
| M (g mol <sup>-1</sup> )                                   | 2614.62                                                                                                                                                                              | 2444.77                                                                                                                                          | 2674.07                                                                                                                                           |
| Crystal system                                             | Triclinic                                                                                                                                                                            | Triclinic                                                                                                                                        | Monoclinic                                                                                                                                        |
| Space group                                                | <i>P</i> <sup>-</sup> 1                                                                                                                                                              | <i>P</i> <sup>-</sup> 1                                                                                                                          | <i>P</i> 2 <sub>1</sub> / <i>n</i>                                                                                                                |
| Crystal habit                                              | Yellow blocks                                                                                                                                                                        | Yellow thin plates                                                                                                                               | Yellow orange plates                                                                                                                              |
| Temperature (K)                                            | 170                                                                                                                                                                                  | 100                                                                                                                                              | 150                                                                                                                                               |
| a (Å)                                                      | 12.5978(9)                                                                                                                                                                           | 13.054(3)                                                                                                                                        | 19.4592(9)                                                                                                                                        |
| b (Å)                                                      | 13.8067(10)                                                                                                                                                                          | 13.837(3)                                                                                                                                        | 26.2685(12)                                                                                                                                       |
| c (Å)                                                      | 15.8805(11)                                                                                                                                                                          | 15.174(3)                                                                                                                                        | 22.0969(10)                                                                                                                                       |
| α (°)                                                      | 91.334(3)                                                                                                                                                                            | 69.18(3)                                                                                                                                         | 90                                                                                                                                                |
| β (°)                                                      | 106.014(3)                                                                                                                                                                           | 73.80(3)                                                                                                                                         | 94.742(2)                                                                                                                                         |
| γ (°)                                                      | 108.407(3)                                                                                                                                                                           | 64.55(3)                                                                                                                                         | 90                                                                                                                                                |
| V (Å <sup>3</sup> )                                        | 2500.6(3)                                                                                                                                                                            | 2287.3(8)                                                                                                                                        | 11256.5(9)                                                                                                                                        |
| Z                                                          | 1                                                                                                                                                                                    | 1                                                                                                                                                | 4                                                                                                                                                 |
| Radiation type                                             | MoKα                                                                                                                                                                                 | Synchrotron, λ = 0.71073 Å                                                                                                                       | MoKα                                                                                                                                              |
| μ (mm <sup>-1</sup> )                                      | 0.58                                                                                                                                                                                 | 0.52                                                                                                                                             | 0.47                                                                                                                                              |
| Crystal size (mm)                                          | 0.30 × 0.29 × 0.10                                                                                                                                                                   | 0.03 × 0.02 × 0.02                                                                                                                               | 0.37 × 0.26 × 0.14                                                                                                                                |
| T <sub>min</sub> , T <sub>max</sub>                        | 0.845, 0.946                                                                                                                                                                         | -                                                                                                                                                | 0.844, 0.936                                                                                                                                      |
| Refl. measured                                             | 33733                                                                                                                                                                                | 28387                                                                                                                                            | 123686                                                                                                                                            |
| Unique reflections                                         | 8771                                                                                                                                                                                 | 7450                                                                                                                                             | 19804                                                                                                                                             |
| Obsd. Reflections                                          | 7768                                                                                                                                                                                 | 7042                                                                                                                                             | 16411                                                                                                                                             |
| [I > 2σ(I)]                                                |                                                                                                                                                                                      |                                                                                                                                                  |                                                                                                                                                   |
| R <sub>int</sub>                                           | 0.36                                                                                                                                                                                 | 0.022                                                                                                                                            | 0.040                                                                                                                                             |
| R[F <sup>2</sup> > 2σ(F <sup>2</sup> )]                    | 0.045                                                                                                                                                                                | 0.037                                                                                                                                            | 0.056                                                                                                                                             |
| wR(F <sup>2</sup> )                                        | 0.128                                                                                                                                                                                | 0.094                                                                                                                                            | 0.185                                                                                                                                             |
| S                                                          | 1.02                                                                                                                                                                                 | 1.05                                                                                                                                             | 1.27                                                                                                                                              |
| Reflections used                                           | 8771                                                                                                                                                                                 | 7450                                                                                                                                             | 19804                                                                                                                                             |
| Parameters                                                 | 1105                                                                                                                                                                                 | 733                                                                                                                                              | 1600                                                                                                                                              |
| Restraints                                                 | 991                                                                                                                                                                                  | 174                                                                                                                                              | 12                                                                                                                                                |
| Δρ <sub>max</sub> , Δρ <sub>min</sub> (e Å <sup>-3</sup> ) | 0.76, -0.74                                                                                                                                                                          | 0.76, -0.89                                                                                                                                      | 1.49, -1.01                                                                                                                                       |

<sup>a</sup>Diffractionmeter: 3BM1 Australian Synchrotron diffractometer.

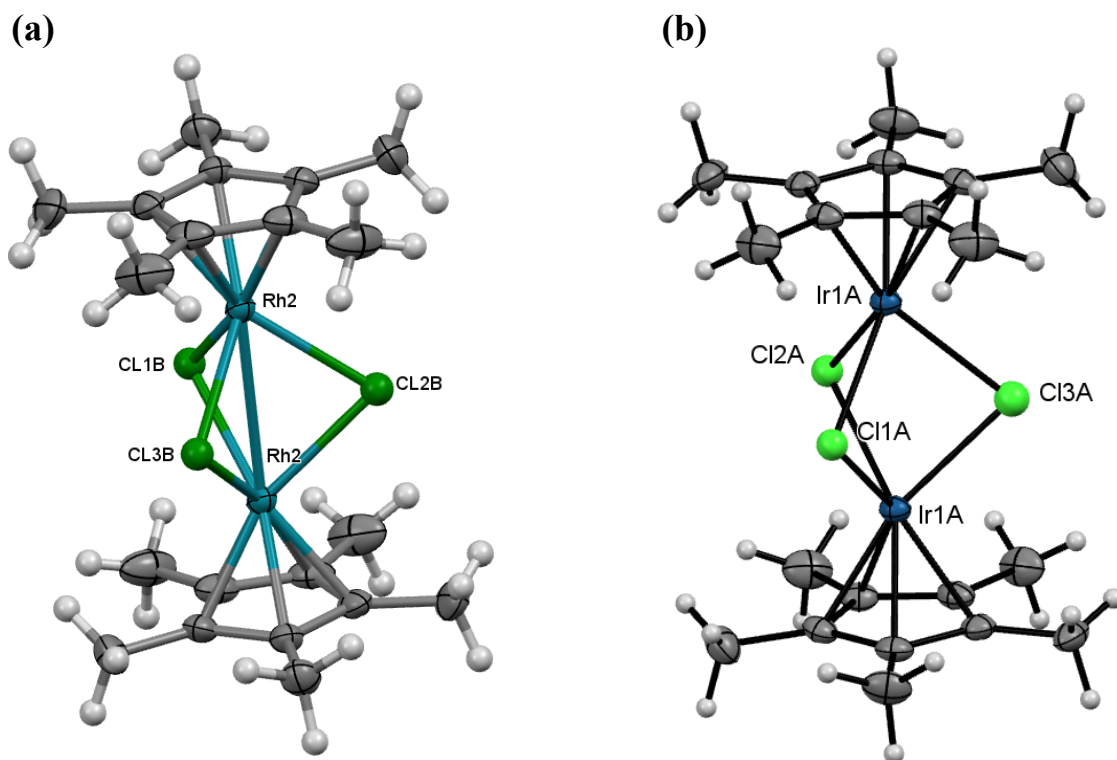

**Figure S1:** ORTEP depictions of the cationic fragment of the single crystal solid state structures of  $[\text{Cp}^*\text{Rh}(\mu\text{-Cl})_3\text{RhCp}^*][\text{BAr}^{\text{F}}_4]$  (**6**) and  $[\text{Cp}^*\text{Ir}(\mu\text{-Cl})_3\text{IrCp}^*][\text{BAr}^{\text{F}}_4]$  (**7**) at 40% thermal ellipsoid for the non-hydrogen atoms.

## References

1. C. Hua, K. Q. Vuong, M. Bhadbhade and B. A. Messerle, *Organometallics*, 2012, **31**, 1790-1800.
2. Bruker, 2001, SADABS, Bruker AXS Inc., Madison, Wisconsin, USA.
3. Bruker, 2001, APEX2 and SAINT, Bruker AXS Inc., Madison, Wisconsin, USA.
4. G. M. Sheldrick, *Acta. Cryst.*, 2008, **A64**, 112-122.
5. C. F. B. Macrae, I. J.; Chisholm, J. A.; Edgington, P. R.; McCabe, P.; Pidcock, E.; Rodriguez-Monge, L.; Taylor, R.; van de Streek, J. and Wood, P. A., *J. Appl. Cryst.*, 2008, **41**, 466-470.
6. W. Kabschi, *J. Appl. Cryst.*, 1993, **26**, 795-800.
